# Supplementary material for: Incidence of Lyme Borreliosis in Germany: Exploring Observed Trends Over Time Using Public Surveillance Data, 2016–2020
Source: PubMed Central journal article supplement (PMC10122258; doi:10.1089/vbz.2022.0046), 2023-04-12
Supplement: Supp_TableS1.pdf [file Supp_TableS1.pdf]

**Table S1. Cases and incidence (per 100,000 person-time,  $\pm$  95% CI) of overall Lyme borreliosis notified by year and by 9 German States  
Territorial Units NUTS1, yearly 2016–2020.**

| State/ NUTS1           | 2016               |                      | 2017               |                      | 2018               |                      | 2019               |                      | 2020               |                      |
|------------------------|--------------------|----------------------|--------------------|----------------------|--------------------|----------------------|--------------------|----------------------|--------------------|----------------------|
|                        | Cases (population) | Incidence [95% CI]   | Cases (population) | Incidence [95% CI]   | Cases (population) | Incidence [95% CI]   | Cases (population) | Incidence [95% CI]   | Cases (population) | Incidence [95% CI]   |
| Bavaria                | 4,592(12,931,569)  | 35.51 [ 34.5;36.55]  | 3,538(12,997,796)  | 27.22 [ 26.34;28.13] | 5,014(13,077,726)  | 38.34 [ 37.29;39.42] | 4,255(13,124,614)  | 32.42 [ 31.46;33.41] | 6,231(13,123,420)  | 47.48 [ 46.32;48.67] |
| Berlin                 | 900 ( 3,574,265)   | 25.18 [ 23.59;26.88] | 763 ( 3,711,089)   | 20.56 [ 19.15;22.07] | 755 ( 3,748,759)   | 20.14 [ 18.75;21.63] | 851 ( 3,669,685)   | 23.19 [ 21.68;24.8]  | 943 ( 3,669,261)   | 25.7 [ 24.11;27.39]  |
| Brandenburg            | 1,673 ( 2,494,781) | 67.06 [ 63.92;70.35] | 1,743 ( 2,503,951) | 69.61 [ 66.42;72.95] | 1,556 ( 2,512,108) | 61.94 [ 58.94;65.09] | 1,535 ( 2,521,768) | 60.87 [ 57.9;63.99]  | 1,608 ( 2,521,957) | 63.76 [ 60.72;66.95] |
| Mecklenburg-Vorpommern | 973 ( 1,610,660)   | 60.41 [ 56.73;64.33] | 1,087 ( 1,611,086) | 67.47 [ 63.58;71.6]  | 852 ( 1,609,673)   | 52.93 [ 49.49;56.6]  | 802 ( 1,608,181)   | 49.87 [ 46.54;53.44] | 649 ( 1,608,028)   | 40.36 [ 37.37;43.59] |
| Rhineland-Palatinate   | 1,471 ( 4,065,782) | 36.18 [ 34.38;38.08] | 1,084 ( 4,073,657) | 26.61 [ 25.07;28.24] | 1,580 ( 4,084,798) | 38.68 [ 36.82;40.63] | 1,185 ( 4,093,264) | 28.95 [ 27.35;30.65] | 1,510 ( 4,094,360) | 36.88 [ 35.07;38.79] |
| Saarland               | 197 ( 996,459)     | 19.77 [ 17.2;22.73]  | 196 ( 994,419)     | 19.71 [ 17.14;22.67] | 375 ( 990,491)     | 37.86 [ 34.22;41.89] | 288 ( 986,977)     | 29.18 [ 26;32.75]    | 332 ( 986,920)     | 33.64 [ 30.21;37.46] |
| Saxony                 | 2,057 ( 4,082,159) | 50.39 [ 48.26;52.61] | 1,867 ( 4,080,874) | 45.75 [ 43.72;47.87] | 2,146 ( 4,078,297) | 52.62 [ 50.44;54.89] | 2,309 ( 4,072,310) | 56.7 [ 54.43;59.06]  | 1,809 ( 4,071,573) | 44.43 [ 42.43;46.52] |
| Saxony-Anhalt          | 506 ( 2,235,970)   | 22.63 [ 20.74;24.69] | 573 ( 2,222,653)   | 25.78 [ 23.75;27.98] | 530 ( 2,208,333)   | 24 [ 22.04;26.13]    | 503 ( 2,194,590)   | 22.92 [ 21;25.01]    | 502 ( 2,195,015)   | 22.87 [ 20.96;24.96] |
| Thuringia              | 567 ( 2,158,356)   | 26.27 [ 24.2;28.52]  | 450 ( 2,151,052)   | 20.92 [ 19.07;22.94] | 565 ( 2,143,399)   | 26.36 [ 24.27;28.62] | 535 ( 2,133,174)   | 25.08 [ 23.04;27.3]  | 483 ( 2,133,392)   | 22.64 [ 20.71;24.75] |
| Total                  | 12,936(34,150,001) | 37.88 [ 37.23;38.54] | 11,301(34,346,577) | 32.9 [ 32.3;33.51]   | 13,373(34,453,585) | 38.81 [ 38.16;39.48] | 12,263(34,404,564) | 35.64 [ 35.02;36.28] | 14,067(34,403,927) | 40.89 [ 40.22;41.57] |
