# Supplementary material for: Incidence of Lyme Borreliosis in Germany: Exploring Observed Trends Over Time Using Public Surveillance Data, 2016–2020
Source: PubMed Central journal article supplement (PMC10122258; doi:10.1089/vbz.2022.0046), 2023-04-12
Supplement: Supp_TableS2.pdf [file Supp_TableS2.pdf]

**Table S2. Cases and incidence (per 100,000 person-time,  $\pm$  95% CI) of overall Lyme borreliosis notified by year and by 19 German Regions Territorial Units NUTS2, yearly 2016–2020.**

| State/ NUTS1           | Region/ NUTS2          | 2016               |                     | 2017               |                     | 2018               |                     | 2019               |                     | 2020               |                       |
|------------------------|------------------------|--------------------|---------------------|--------------------|---------------------|--------------------|---------------------|--------------------|---------------------|--------------------|-----------------------|
|                        |                        | Cases (population) | Incidence [95% CI]  | Cases (population) | Incidence [95% CI]  | Cases (population) | Incidence [95% CI]  | Cases (population) | Incidence [95% CI]  | Cases (population) | Incidence [95% CI]    |
| Bavaria                | Mittelfranken          | 782 ( 1,750,224)   | 44.68 [41.66;47.92] | 596 ( 1,759,669)   | 33.87 [31.26;36.7]  | 792 ( 1,770,228)   | 44.74 [41.73;47.97] | 736 ( 1,775,205)   | 41.46 [38.57;44.56] | 881 ( 1,775,136)   | 49.63 [46.46;53.02]   |
| Bavaria                | Niederbayern           | 988 ( 1,219,452)   | 81.02 [76.12;86.23] | 702 ( 1,230,068)   | 57.07 [53;61.45]    | 1,135 ( 1,238,542) | 91.64 [86.46;97.13] | 924 ( 1,244,109)   | 74.27 [69.63;79.21] | 1,541 ( 1,244,147) | 123.86 [117.83;130.2] |
| Bavaria                | Oberbayern             | 777 ( 4,633,274)   | 16.77 [15.63;17.99] | 798 ( 4,650,350)   | 17.16 [16.01;18.39] | 1,049 ( 4,685,127) | 22.39 [21.08;23.79] | 763 ( 4,709,877)   | 16.2 [15.09;17.39]  | 1,320 ( 4,710,921) | 28.02 [26.55;29.57]   |
| Bavaria                | Oberfranken            | 433 ( 1,062,316)   | 40.76 [37.1;44.78]  | 369 ( 1,066,782)   | 34.59 [31.24;38.3]  | 452 ( 1,067,548)   | 42.34 [38.61;46.43] | 418 ( 1,065,240)   | 39.24 [35.65;43.19] | 635 ( 1,065,436)   | 59.6 [55.14;64.42]    |
| Bavaria                | Oberpfalz              | 485 ( 1,098,279)   | 44.16 [40.4;48.27]  | 336 ( 1,104,536)   | 30.42 [27.34;33.85] | 454 ( 1,109,211)   | 40.93 [37.33;44.87] | 403 ( 1,112,031)   | 36.24 [32.87;39.95] | 750 ( 1,112,100)   | 67.44 [62.78;72.44]   |
| Bavaria                | Schwaben               | 413 ( 1,857,850)   | 22.23 [20.19;24.48] | 340 ( 1,873,278)   | 18.15 [16.32;20.18] | 471 ( 1,887,776)   | 24.95 [22.8;27.31]  | 430 ( 1,899,293)   | 22.64 [20.6;24.88]  | 477 ( 1,899,642)   | 25.11 [22.96;27.47]   |
| Bavaria                | Unterfranken           | 714 ( 1,309,131)   | 54.54 [50.68;58.69] | 397 ( 1,313,265)   | 30.23 [27.4;33.35]  | 661 ( 1,316,995)   | 50.19 [46.51;54.16] | 581 ( 1,317,759)   | 44.09 [40.65;47.82] | 627 ( 1,317,504)   | 47.59 [44.01;51.46]   |
| Berlin                 | Berlin                 | 900 ( 3,574,265)   | 25.18 [23.59;26.88] | 763 ( 3,711,089)   | 20.56 [19.15;22.07] | 755 ( 3,748,759)   | 20.14 [18.75;21.63] | 851 ( 3,669,685)   | 23.19 [21.68;24.8]  | 943 ( 3,669,261)   | 25.7 [24.11;27.39]    |
| Brandenburg            | Brandenburg            | 1,673 ( 2,494,781) | 67.06 [63.92;70.35] | 1,743 ( 2,503,951) | 69.61 [66.42;72.95] | 1,556 ( 2,512,108) | 61.94 [58.94;65.09] | 1,535 ( 2,521,768) | 60.87 [57.9;63.99]  | 1,608 ( 2,521,957) | 63.76 [60.72;66.95]   |
| Mecklenburg-Vorpommern | Mecklenburg-Vorpommern | 973 ( 1,610,660)   | 60.41 [56.73;64.33] | 1,087 ( 1,611,086) | 67.47 [63.58;71.6]  | 852 ( 1,609,673)   | 52.93 [49.49;56.6]  | 802 ( 1,608,181)   | 49.87 [46.54;53.44] | 649 ( 1,608,028)   | 40.36 [37.37;43.59]   |
| Rhineland-Palatinate   | Koblenz                | 740 ( 1,492,236)   | 49.59 [46.14;53.29] | 567 ( 1,492,891)   | 37.98 [34.98;41.24] | 730 ( 1,495,902)   | 48.8 [45.39;52.47]  | 585 ( 1,498,079)   | 39.05 [36.01;42.34] | 824 ( 1,498,182)   | 55 [51.37;58.88]      |
| Rhineland-Palatinate   | Rheinessen-Pfalz       | 532 ( 2,045,367)   | 26.01 [23.89;28.32] | 388 ( 2,050,740)   | 18.92 [17.13;20.9]  | 629 ( 2,058,246)   | 30.56 [28.26;33.04] | 451 ( 2,062,186)   | 21.87 [19.94;23.98] | 497 ( 2,062,241)   | 24.1 [22.07;26.31]    |
| Rhineland-Palatinate   | Trier                  | 199 ( 528,693)     | 37.64 [32.76;43.24] | 129 ( 529,557)     | 24.36 [20.5;28.94]  | 221 ( 530,995)     | 41.62 [36.48;47.48] | 149 ( 533,095)     | 27.95 [23.81;32.81] | 189 ( 533,145)     | 35.45 [30.74;40.88]   |
| Saarland               | Saarland               | 197 ( 996,459)     | 19.77 [17.2;22.73]  | 196 ( 994,419)     | 19.71 [17.14;22.67] | 375 ( 990,491)     | 37.86 [34.22;41.89] | 288 ( 986,977)     | 29.18 [26;32.75]    | 332 ( 986,920)     | 33.64 [30.21;37.46]   |
| Saxony                 | Chemnitz               | 905 ( 1,454,049)   | 62.24 [58.32;66.43] | 767 ( 1,444,989)   | 53.08 [49.45;56.97] | 907 ( 1,436,490)   | 63.14 [59.16;67.38] | 1,099 ( 1,426,347) | 77.05 [72.63;81.74] | 754 ( 1,426,409)   | 52.86 [49.22;56.77]   |
| Saxony                 | Dresden                | 987 ( 1,600,195)   | 61.68 [57.95;65.65] | 940 ( 1,598,639)   | 58.8 [55.16;62.68]  | 1,051 ( 1,598,236) | 65.76 [61.9;69.86]  | 996 ( 1,596,666)   | 62.38 [58.63;66.37] | 908 ( 1,596,624)   | 56.87 [53.29;60.69]   |
| Saxony                 | Leipzig                | 165 ( 1,027,397)   | 16.06 [13.79;18.7]  | 160 ( 1,037,613)   | 15.42 [13.21;18]    | 188 ( 1,043,285)   | 18.02 [15.62;20.79] | 214 ( 1,049,020)   | 20.4 [17.84;23.32]  | 147 ( 1,049,251)   | 14.01 [11.92;16.47]   |
| Saxony-Anhalt          | Saxony-Anhalt          | 506 ( 2,235,970)   | 22.63 [20.74;24.69] | 573 ( 2,222,653)   | 25.78 [23.75;27.98] | 530 ( 2,208,333)   | 24 [22.04;26.13]    | 503 ( 2,194,590)   | 22.92 [21;25.01]    | 502 ( 2,195,015)   | 22.87 [20.96;24.96]   |
| Thuringia              | Thuringia              | 567 ( 2,158,356)   | 26.27 [24.2;28.52]  | 450 ( 2,151,052)   | 20.92 [19.07;22.94] | 565 ( 2,143,399)   | 26.36 [24.27;28.62] | 535 ( 2,133,174)   | 25.08 [23.04;27.3]  | 483 ( 2,133,392)   | 22.64 [20.71;24.75]   |
