# Supplementary material for: Incidence of Lyme Borreliosis in Germany: Exploring Observed Trends Over Time Using Public Surveillance Data, 2016–2020
Source: PubMed Central journal article supplement (PMC10122258; doi:10.1089/vbz.2022.0046), 2023-04-12
Supplement: Supp_TableS3.pdf [file Supp_TableS3.pdf]

**Table S3. Cases and incidence (per 100,000 person-time) of overall Lyme borreliosis by year and by 158 German Counties Territorial**

**Units NUTS3, yearly 2016–2020.**

| State/ NUTS1 | Region/ NUTS2 | County/ NUTS3                  | 2016               |                              | 2017               |                           | 2018               |                       | 2019               |                     | 2020               |                              |
|--------------|---------------|--------------------------------|--------------------|------------------------------|--------------------|---------------------------|--------------------|-----------------------|--------------------|---------------------|--------------------|------------------------------|
|              |               |                                | Cases (population) | Incidence [95% CI]           | Cases (population) | Incidence [95% CI]        | Cases (population) | Incidence [95% CI]    | Cases (population) | Incidence [95% CI]  | Cases (population) | Incidence [95% CI]           |
| Bavaria      | Schwaben      | Aichach-Friedberg County       | 19 ( 131,397)      | 14.46 [9.26;22.58]<br>84.08  | 11 ( 132,530)      | 8.3 [4.63;14.86]<br>82.47 | 37 ( 133,574)      | 27.7 [20.1;38.18]     | 32 ( 134,680)      | 23.76 [16.83;33.54] | 47 ( 134,670)      | 34.9 [26.25;46.4]<br>111.19  |
| Bavaria      | Oberbayern    | Altötting County               | 92 ( 109,420)      | [68.57;103.09]               | 91 ( 110,343)      | [67.18;101.23]            | 95 ( 111,215)      | 85.42 [69.89;104.4]   | 80 ( 111,514)      | 71.74 [57.65;89.27] | 124 ( 111,521)     | [93.27;132.54]               |
| Bavaria      | Oberpfalz     | Amberg-Weizbach County         | 76 ( 103,009)      | 73.78 [58.96;92.33]          | 43 ( 102,846)      | 41.81 [31.04;56.31]       | 50 ( 103,114)      | 48.49 [36.79;63.92]   | 38 ( 103,037)      | 36.88 [26.87;50.61] | 58 ( 103,056)      | 56.28 [43.54;72.74]          |
| Bavaria      | Mittelfranken | Ansbach County                 | 136 ( 182,184)     | 74.65 [63.12;88.29]          | 123 ( 183,254)     | 67.12 [56.26;80.07]       | 136 ( 183,958)     | 73.93 [62.51;87.44]   | 102 ( 184,582)     | 55.26 [45.53;67.07] | 127 ( 184,593)     | 68.8 [57.83;81.85]           |
| Bavaria      | Unterfranken  | Aschaffenburg County           | 95 ( 173,516)      | 54.75 [44.79;66.92]          | 28 ( 174,021)      | 16.09 [11.13;23.25]       | 53 ( 174,227)      | 30.42 [23.26;39.78]   | 38 ( 174,232)      | 21.81 [15.89;29.93] | 57 ( 174,205)      | 32.72 [25.26;42.39]          |
| Bavaria      | Schwaben      | Augsburg County                | 89 ( 247,566)      | 35.95 [29.22;44.23]<br>84.38 | 59 ( 249,788)      | 23.62 [18.31;30.46]       | 87 ( 251,518)      | 34.59 [28.05;42.66]   | 108 ( 253,462)     | 42.61 [35.3;51.44]  | 13 ( 253,411)      | 5.13 [3;8.78]                |
| Bavaria      | Unterfranken  | Bad Kissingen County           | 87 ( 103,105)      | [68.42;104.06]               | 50 ( 103,263)      | 48.42 [36.73;63.82]       | 85 ( 103,218)      | 82.35 [66.61;101.81]  | 74 ( 103,237)      | 71.68 [57.11;89.97] | 103 ( 103,237)     | 99.77 [82.28;120.97]         |
| Bavaria      | Oberbayern    | Bad Tölz-Wolfratshausen County | 30 ( 125,681)      | 23.87 [16.72;34.07]          | 21 ( 126,582)      | 16.59 [10.85;25.36]       | 22 ( 127,241)      | 17.29 [11.42;26.18]   | 25 ( 127,943)      | 19.54 [13.24;28.84] | 36 ( 127,932)      | 28.14 [20.33;38.95]          |
| Bavaria      | Oberfranken   | Bamberg County                 | 22 ( 146,082)      | 15.06 [9.95;22.8]            | 15 ( 146,628)      | 10.23 [6.2;16.88]         | 15 ( 147,059)      | 10.2 [6.18;16.83]     | 30 ( 147,131)      | 20.39 [14.28;29.11] | 104 ( 147,163)     | 70.67 [58.33;85.61]          |
| Bavaria      | Oberfranken   | Bayreuth County                | 55 ( 103,872)      | 52.95 [40.69;68.91]          | 23 ( 103,791)      | 22.16 [14.77;33.25]       | 30 ( 103,663)      | 28.94 [20.27;41.31]   | 35 ( 103,673)      | 33.76 [24.28;46.95] | 52 ( 103,668)      | 50.16 [38.26;65.77]          |
| Bavaria      | Oberbayern    | Berchtesgadener Land County    | 26 ( 104,460)      | 24.89 [16.99;36.47]          | 28 ( 105,066)      | 26.65 [18.44;38.51]       | 37 ( 105,714)      | 35 [25.39;48.24]      | 30 ( 105,932)      | 28.32 [19.84;40.43] | 34 ( 105,919)      | 32.1 [22.97;44.85]           |
| Bavaria      | Oberpfalz     | Cham County                    | 92 ( 126,914)      | 72.49 [59.12;88.89]          | 54 ( 127,328)      | 42.41 [32.51;55.33]       | 70 ( 127,877)      | 54.74 [43.33;69.15]   | 66 ( 128,006)      | 51.56 [40.53;65.58] | 119 ( 127,998)     | 92.97 [77.7;111.23]          |
| Bavaria      | Oberfranken   | Coburg County                  | 40 ( 86,730)       | 46.12 [33.87;62.79]          | 46 ( 86,891)       | 52.94 [39.7;70.6]         | 75 ( 86,906)       | 86.3 [68.86;108.15]   | 62 ( 86,750)       | 71.47 [55.76;91.6]  | 68 ( 86,746)       | 78.39 [61.85;99.36]          |
| Bavaria      | Oberbayern    | Dachau County                  | 4 ( 150,943)       | 2.65 [1.03;6.81]<br>103.74   | 7 ( 152,838)       | 4.58 [2.22;9.45]          | 9 ( 153,846)       | 5.85 [3.08;11.12]     | 8 ( 155,039)       | 5.16 [2.61;10.18]   | 16 ( 154,889)      | 10.33 [6.36;16.78]<br>128.06 |
| Bavaria      | Niederbayern  | Deggendorf County              | 122 ( 117,602)     | [86.9;123.84]                | 86 ( 118,735)      | 72.43 [58.66;89.43]       | 139 ( 119,324)     | 116.49 [98.68;137.52] | 103 ( 119,476)     | 86.21 [71.1;104.53] | 153 ( 119,475)     | [109.32;150.01]              |
| Bavaria      | Schwaben      | Dillingen a.d.Donau County     | 39 ( 94,545)       | 41.25 [30.18;56.38]          | 41 ( 95,150)       | 43.09 [31.77;58.45]       | 35 ( 96,022)       | 36.45 [26.21;50.69]   | 56 ( 96,568)       | 57.99 [44.66;75.29] | 31 ( 96,573)       | 32.1 [22.62;45.56]<br>129.29 |
| Bavaria      | Niederbayern  | Dingolfing-Landau County       | 70 ( 95,031)       | 73.66 [58.31;93.04]<br>85.41 | 64 ( 95,837)       | 66.78 [52.3;85.26]        | 90 ( 96,216)       | 93.54 [76.11;114.95]  | 65 ( 96,683)       | 67.23 [52.76;85.67] | 125 ( 96,682)      | [108.53;154.01]              |
| Bavaria      | Schwaben      | Donau-Ries County              | 113 ( 132,303)     | [71.05;102.67]               | 71 ( 133,034)      | 53.37 [42.32;67.31]       | 83 ( 133,505)      | 62.17 [50.16;77.05]   | 54 ( 133,796)      | 40.36 [30.94;52.65] | 105 ( 133,775)     | 78.49 [64.85;95]             |
| Bavaria      | Oberbayern    | Ebersberg County               | 38 ( 139,041)      | 27.33 [19.91;37.51]          | 67 ( 140,786)      | 47.59 [37.48;60.43]       | 73 ( 142,134)      | 51.36 [40.85;64.57]   | 50 ( 143,637)      | 34.81 [26.41;45.89] | 79 ( 143,636)      | 55 [44.14;68.53]             |
| Bavaria      | Oberbayern    | Eichstätt County               | 34 ( 130,820)      | 25.99 [18.6;36.31]           | 21 ( 131,661)      | 15.95 [10.43;24.38]       | 38 ( 132,358)      | 28.71 [20.92;39.4]    | 20 ( 132,890)      | 15.05 [9.74;23.25]  | 57 ( 132,867)      | 42.9 [33.12;55.57]           |
| Bavaria      | Oberbayern    | Erding County                  | 25 ( 135,428)      | 18.46 [12.5;27.25]           | 26 ( 136,914)      | 18.99 [12.96;27.82]       | 37 ( 137,649)      | 26.88 [19.5;37.05]    | 27 ( 138,178)      | 19.54 [13.43;28.43] | 43 ( 138,175)      | 31.12 [23.11;41.91]          |
| Bavaria      | Mittelfranken | Erlangen-Höchstadt County      | 85 ( 134,643)      | 63.13 [51.06;78.05]          | 61 ( 135,345)      | 45.07 [35.09;57.88]       | 79 ( 136,277)      | 57.97 [46.52;72.23]   | 67 ( 137,267)      | 48.81 [38.44;61.98] | 63 ( 137,255)      | 45.9 [35.88;58.72]           |

|         |               |                                         |                |                              |               |                              |                |                                       |                |                               |                |                               |
|---------|---------------|-----------------------------------------|----------------|------------------------------|---------------|------------------------------|----------------|---------------------------------------|----------------|-------------------------------|----------------|-------------------------------|
| Bavaria | Oberfranken   | Forchheim County                        | 102 ( 115,254) | 88.5 [72.92;107.41]          | 46 ( 115,694) | 39.76 [29.81;53.03]          | 121 ( 116,101) | 104.22 [87.24;124.5]                  | 103 ( 116,200) | 88.64 [73.1;107.48]           | 203 ( 116,206) | 174.69 [152.27;200.4]         |
| Bavaria | Oberbayern    | Freising County                         | 45 ( 175,781)  | 25.6 [19.13;34.25]<br>170.12 | 50 ( 177,999) | 28.09 [21.31;37.03]<br>93.18 | 40 ( 179,131)  | 22.33 [16.4;30.4]                     | 34 ( 179,989)  | 18.89 [13.52;26.39]<br>113.58 | 59 ( 179,988)  | 32.78 [25.42;42.28]<br>160.79 |
| Bavaria | Niederbayern  | Freyung-Grafenau County                 | 133 ( 78,180)  | [143.58;201.56]              | 73 ( 78,343)  | [74.12;117.13]               | 167 ( 78,356)  | 213.13 [183.19;247.95]                | 89 ( 78,359)   | [92.32;139.73]                | 126 ( 78,363)  | [135.08;191.39]               |
| Bavaria | Oberbayern    | Fürstentfeldbruck County                | 34 ( 216,837)  | 15.68 [11.22;21.91]          | 18 ( 217,918) | 8.26 [5.23;13.06]            | 38 ( 219,273)  | 17.33 [12.63;23.78]                   | 31 ( 219,236)  | 14.14 [9.96;20.07]            | 63 ( 219,283)  | 28.73 [22.46;36.75]           |
| Bavaria | Mittelfranken | Fürth County                            | 110 ( 115,973) | 94.85 [78.71;114.3]          | 78 ( 116,192) | 67.13 [53.8;83.76]           | 85 ( 117,387)  | 72.41 [58.57;89.52]                   | 96 ( 117,849)  | 81.46 [66.72;99.46]           | 132 ( 117,857) | 112 [94.46;132.79]            |
| Bavaria | Oberbayern    | Garmisch-Partenkirchen County           | 14 ( 87,884)   | 15.93 [9.49;26.74]           | 11 ( 88,141)  | 12.48 [6.97;22.35]           | 16 ( 88,447)   | 18.09 [11.14;29.39]                   | 13 ( 88,435)   | 14.7 [8.59;25.15]             | 22 ( 88,424)   | 24.88 [16.43;37.67]           |
| Bavaria | Schwaben      | Günzburg County                         | 30 ( 123,508)  | 24.29 [17.02;34.67]          | 35 ( 124,511) | 28.11 [20.21;39.09]          | 59 ( 125,746)  | 46.92 [36.38;60.51]                   | 34 ( 127,008)  | 26.77 [19.16;37.4]            | 56 ( 127,013)  | 44.09 [33.96;57.24]           |
| Bavaria | Unterfranken  | Haßberge County                         | 36 ( 84,368)   | 42.67 [30.82;59.06]          | 32 ( 84,455)  | 37.89 [26.84;53.48]          | 53 ( 84,597)   | 62.65 [47.9;81.93]                    | 40 ( 84,388)   | 47.4 [34.81;64.53]            | 45 ( 84,380)   | 53.33 [39.86;71.35]           |
| Bavaria | Oberfranken   | Hof County                              | 28 ( 95,923)   | 29.19 [20.2;42.18]           | 27 ( 95,779)  | 28.19 [19.38;41.01]          | 23 ( 95,317)   | 24.13 [16.08;36.21]                   | 23 ( 94,806)   | 24.26 [16.17;36.4]            | 25 ( 94,805)   | 26.37 [17.86;38.93]           |
| Bavaria | Niederbayern  | Kelheim County                          | 29 ( 119,983)  | 24.17 [16.83;34.71]          | 15 ( 121,163) | 12.38 [7.5;20.43]            | 30 ( 122,249)  | 24.54 [17.19;35.03]                   | 20 ( 123,077)  | 16.25 [10.52;25.1]            | 49 ( 123,054)  | 39.82 [30.12;52.64]           |
| Bavaria | Unterfranken  | Kitzingen County                        | 14 ( 89,744)   | 15.6 [9.29;26.19]            | 9 ( 90,452)   | 9.95 [5.23;18.91]            | 59 ( 90,909)   | 64.9 [50.32;83.7]                     | 51 ( 91,153)   | 55.95 [42.56;73.55]           | 43 ( 91,160)   | 47.17 [35.02;63.53]           |
| Bavaria | Oberfranken   | Kronach County                          | 25 ( 67,604)   | 36.98 [25.05;54.59]          | 51 ( 67,478)  | 75.58 [57.49;99.35]<br>81.93 | 43 ( 67,135)   | 64.05 [47.56;86.26]<br>[63.53;105.66] | 40 ( 66,745)   | 59.93 [44.02;81.59]           | 36 ( 66,741)   | 53.94 [38.97;74.66]           |
| Bavaria | Oberfranken   | Kulmbach County                         | 51 ( 71,993)   | 70.84 [53.89;93.12]          | 59 ( 72,013)  |                              | 59 ( 71,846)   | 82.12 [63.67;105.9]                   | 45 ( 71,565)   | 62.88 [47;84.12]              | 64 ( 71,564)   | 89.43 [70.05;114.17]          |
| Bavaria | Oberbayern    | Landsberg a.Lech County                 | 30 ( 118,718)  | 25.27 [17.7;36.07]           | 32 ( 119,136) | 26.86 [19.03;37.91]          | 39 ( 120,074)  | 32.48 [23.76;44.4]                    | 21 ( 120,275)  | 17.46 [11.42;26.69]           | 52 ( 120,315)  | 43.22 [32.96;56.67]           |
| Bavaria | Niederbayern  | Landshut County                         | 43 ( 155,459)  | 27.66 [20.54;37.25]          | 45 ( 157,233) | 28.62 [21.39;38.29]          | 86 ( 158,701)  | 54.19 [43.89;66.91]                   | 57 ( 159,888)  | 35.65 [27.52;46.18]           | 113 ( 159,898) | 70.67 [58.79;84.95]           |
| Bavaria | Oberfranken   | Lichtenfels County                      | 32 ( 66,639)   | 48.02 [34.02;67.78]          | 33 ( 66,775)  | 49.42 [35.19;69.39]          | 14 ( 66,826)   | 20.95 [12.48;35.17]                   | 26 ( 66,769)   | 38.94 [26.58;57.05]           | 33 ( 66,775)   | 49.42 [35.19;69.39]           |
| Bavaria | Schwaben      | Lindau County                           | 1 ( 80,645)    | 1.24 [0.22;7.02]             | NA ( NA)      | NA [NA;NA]                   | 5 ( 81,699)    | 6.12 [2.61;14.33]                     | 6 ( 81,967)    | 7.32 [3.35;15.97]             | 15 ( 81,967)   | 18.3 [11.09;30.19]            |
| Bavaria | Unterfranken  | Main-Spessart County                    | 121 ( 126,305) | 95.8 [80.19;114.45]          | 32 ( 126,532) | 25.29 [17.92;35.7]           | 84 ( 126,373)  | 66.47 [53.7;82.28]                    | 68 ( 126,160)  | 53.9 [42.52;68.32]            | 64 ( 126,158)  | 50.73 [39.73;64.77]           |
| Bavaria | Oberbayern    | Miesbach County                         | 5 ( 98,814)    | 5.06 [2.16;11.85]            | 5 ( 99,206)   | 5.04 [2.15;11.8]             | 6 ( 99,668)    | 6.02 [2.76;13.13]                     | 1 ( 100,000)   | 1 [0.18;5.66]                 | 17 ( 100,000)  | 17 [10.61;27.23]              |
| Bavaria | Unterfranken  | Miltenberg County                       | 44 ( 128,542)  | 34.23 [25.5;45.95]           | 38 ( 128,465) | 29.58 [21.55;40.6]           | 59 ( 128,765)  | 45.82 [35.53;59.09]                   | 48 ( 128,755)  | 37.28 [28.12;49.42]           | 57 ( 128,755)  | 44.27 [34.17;57.35]           |
| Bavaria | Oberbayern    | Mühlhof a.Inn County                    | 28 ( 113,223)  | 24.73 [17.11;35.74]          | 33 ( 114,504) | 28.82 [20.52;40.47]          | 35 ( 115,245)  | 30.37 [21.84;42.23]                   | 37 ( 115,878)  | 31.93 [23.17;44.01]           | 62 ( 115,866)  | 53.51 [41.75;68.58]           |
| Bavaria | Oberbayern    | München County                          | 43 ( 343,450)  | 12.52 [9.3;16.86]            | 46 ( 346,386) | 13.28 [9.96;17.71]           | 59 ( 348,906)  | 16.91 [13.11;21.81]                   | 39 ( 350,404)  | 11.13 [8.14;15.21]            | 75 ( 350,467)  | 21.4 [17.07;26.82]            |
| Bavaria | Schwaben      | Neu-Ulm County                          | 5 ( 171,233)   | 2.92 [1.25;6.84]             | 7 ( 172,414)  | 4.06 [1.97;8.38]             | 13 ( 174,263)  | 7.46 [4.36;12.76]                     | 11 ( 175,159)  | 6.28 [3.51;11.25]             | 8 ( 175,055)   | 4.57 [2.32;9.02]              |
| Bavaria | Oberbayern    | Neuburg-Schrobenhausen County           | 33 ( 95,763)   | 34.46 [24.54;48.39]          | 23 ( 96,154)  | 23.92 [15.94;35.89]          | 20 ( 96,665)   | 20.69 [13.39;31.96]                   | 11 ( 97,345)   | 11.3 [6.31;20.24]             | 11 ( 97,345)   | 11.3 [6.31;20.24]             |
| Bavaria | Oberpfalz     | Neumarkt i.d.Opf. County                | 24 ( 131,651)  | 18.23 [12.25;27.13]          | 16 ( 132,670) | 12.06 [7.42;19.59]           | 18 ( 133,531)  | 13.48 [8.53;21.31]                    | 41 ( 134,559)  | 30.47 [22.46;41.33]           | 59 ( 134,580)  | 43.84 [33.99;56.54]           |
| Bavaria | Mittelfranken | Neustadt a.d.Aisch-Bad Windsheim County | 58 ( 99,332)   | 58.39 [45.18;75.47]          | 60 ( 99,635)  | 60.22 [46.79;77.5]           | 91 ( 100,364)  | 90.67 [73.86;111.3]                   | 83 ( 101,010)  | 82.17 [66.3;101.84]           | 94 ( 101,010)  | 93.06 [76.06;113.86]          |
| Bavaria | Oberpfalz     | Neustadt a.d.Waldnaab County            | 56 ( 94,531)   | 59.24 [45.63;76.91]          | 34 ( 94,497)  | 35.98 [25.75;50.27]          | 37 ( 94,364)   | 39.21 [28.45;54.04]                   | 49 ( 94,449)   | 51.88 [39.25;68.57]           | 71 ( 94,453)   | 75.17 [59.6;94.8]             |
| Bavaria | Mittelfranken | Nürnberg Land County                    | 86 ( 168,892)  | 50.92 [41.24;62.87]          | 37 ( 169,725) | 21.8 [15.82;30.05]           | 74 ( 170,350)  | 43.44 [34.61;54.53]                   | 70 ( 170,773)  | 40.99 [32.45;51.78]           | 92 ( 170,782)  | 53.87 [43.93;66.06]           |
| Bavaria | Schwaben      | Oberallgäu County                       | 15 ( 153,689)  | 9.76 [5.92;16.1]             | 30 ( 154,560) | 19.41 [13.6;27.71]           | 46 ( 155,353)  | 29.61 [22.2;39.49]                    | 55 ( 156,028)  | 35.25 [27.09;45.88]           | 86 ( 155,995)  | 55.13 [44.65;68.07]           |
| Bavaria | Schwaben      | Ostallgäu County                        | 45 ( 138,249)  | 32.55 [24.33;43.55]          | 42 ( 139,257) | 30.16 [22.32;40.76]          | 33 ( 140,306)  | 23.52 [16.75;33.03]                   | 33 ( 141,207)  | 23.37 [16.64;32.82]           | 66 ( 141,176)  | 46.75 [36.75;59.47]           |

|             |               |                                                           |                |                                                  |                |                                                 |                |                       |                |                                                                                                        |                |                                                                               |
|-------------|---------------|-----------------------------------------------------------|----------------|--------------------------------------------------|----------------|-------------------------------------------------|----------------|-----------------------|----------------|--------------------------------------------------------------------------------------------------------|----------------|-------------------------------------------------------------------------------|
| Bavaria     | Niederbayern  | Passau County<br>Pfaffenhofen a.d.Ilm<br>County           | 274 ( 188,900) | 145.05<br>[128.87;163.26]                        | 119 ( 190,491) | 62.47 [52.21;74.74]                             | 201 ( 192,050) | 104.66 [91.16;120.15] | 158 ( 192,659) | 82.01 [70.18;95.83]                                                                                    | 235 ( 192,655) | 121.98<br>[107.36;138.59]                                                     |
| Bavaria     | Oberbayern    |                                                           | 22 ( 125,071)  | 17.59 [11.62;26.63]<br>159.35<br>[133.58;190.08] | 29 ( 126,252)  | 22.97 [15.99;32.99]<br>103.24<br>[82.97;128.46] | 34 ( 127,150)  | 26.74 [19.14;37.36]   | 38 ( 128,248)  | 29.63 [21.59;40.66]<br>142.1<br>[117.92;171.22]                                                        | 55 ( 128,235)  | 42.89 [32.96;55.82]<br>237.7<br>[205.78;274.56]<br>117.48<br>[103.2;133.74]   |
| Bavaria     | Niederbayern  | Regen County                                              | 123 ( 77,189)  |                                                  | 80 ( 77,489)   |                                                 | 172 ( 77,656)  | 221.49 [190.8;257.11] | 110 ( 77,410)  |                                                                                                        | 184 ( 77,408)  |                                                                               |
| Bavaria     | Oberpfalz     | Regensburg County                                         | 80 ( 190,476)  | 42 [33.75;52.26]                                 | 85 ( 192,221)  | 44.22 [35.77;54.67]                             | 161 ( 193,579) | 83.17 [71.28;97.04]   | 119 ( 194,064) | 61.32 [51.25;73.37]                                                                                    | 228 ( 194,076) |                                                                               |
| Bavaria     | Unterfranken  | Rhön-Grabfeld County                                      | 29 ( 79,846)   | 36.32 [25.29;52.16]                              | 19 ( 79,798)   | 23.81 [15.24;37.19]                             | 31 ( 79,692)   | 38.9 [27.41;55.21]    | 18 ( 79,646)   | 22.6 [14.3;35.72]                                                                                      | 35 ( 79,636)   | 43.95 [31.6;61.11]                                                            |
| Bavaria     | Oberbayern    | Rosenheim County                                          | 111 ( 257,481) | 43.11 [35.8;51.91]                               | 96 ( 259,459)  | 37 [30.3;45.18]                                 | 96 ( 261,011)  | 36.78 [30.12;44.91]   | 85 ( 261,297)  | 32.53 [26.31;40.22]                                                                                    | 123 ( 261,313) | 47.07 [39.46;56.15]                                                           |
| Bavaria     | Mittelfranken | Roth County                                               | 93 ( 125,557)  | 74.07 [60.47;90.72]                              | 73 ( 126,101)  | 57.89 [46.05;72.77]                             | 102 ( 126,960) | 80.34 [66.19;97.51]   | 122 ( 126,753) | 96.25 [80.62;114.9]<br>115.22<br>[97.66;135.94]                                                        | 124 ( 126,750) | 97.83 [82.07;116.62]<br>172.01<br>[150.23;196.94]<br>107.53<br>[92.07;125.58] |
| Bavaria     | Niederbayern  | Rottal-Inn County                                         | 95 ( 119,617)  | 79.42 [64.98;97.07]                              | 95 ( 120,375)  | 78.92 [64.57;96.46]                             | 90 ( 120,660)  | 74.59 [60.69;91.67]   | 140 ( 121,507) |                                                                                                        | 209 ( 121,505) |                                                                               |
| Bavaria     | Oberpfalz     | Schwandorf County                                         | 93 ( 145,381)  | 63.97 [52.23;78.35]                              | 58 ( 146,502)  | 39.59 [30.63;51.17]                             | 74 ( 147,176)  | 50.28 [40.06;63.11]   | 58 ( 147,884)  | 39.22 [30.34;50.69]                                                                                    | 159 ( 147,866) |                                                                               |
| Bavaria     | Unterfranken  | Schweinfurt County                                        | 63 ( 114,817)  | 54.87 [42.89;70.19]                              | 45 ( 115,119)  | 39.09 [29.22;52.3]                              | 52 ( 115,095)  | 45.18 [34.46;59.24]   | 52 ( 115,453)  | 45.04 [34.35;59.05]                                                                                    | 24 ( 115,440)  | 20.79 [13.97;30.93]                                                           |
| Bavaria     | Oberbayern    | Starnberg County                                          | 16 ( 134,680)  | 11.88 [7.31;19.3]                                | 15 ( 135,501)  | 11.07 [6.71;18.27]                              | 50 ( 136,091)  | 36.74 [27.87;48.43]   | 39 ( 136,650)  | 28.54 [20.88;39.01]<br>93.95<br>[76.87;114.82]                                                         | 29 ( 136,664)  | 21.22 [14.78;30.47]<br>188.88<br>[163.94;217.6]                               |
| Bavaria     | Niederbayern  | Straubing-Bogen County                                    | 69 ( 99,223)   | 69.54 [54.96;87.99]                              | 58 ( 99,845)   | 58.09 [44.94;75.08]                             | 70 ( 100,647)  | 69.55 [55.06;87.85]   | 95 ( 101,118)  |                                                                                                        | 191 ( 101,122) |                                                                               |
| Bavaria     | Oberpfalz     | Tirschenreuth County                                      | 7 ( 72,917)    | 9.6 [4.65;19.82]                                 | 14 ( 72,727)   | 19.25 [11.47;32.31]                             | 10 ( 72,516)   | 13.79 [7.49;25.38]    | 10 ( 72,046)   | 13.88 [7.54;25.55]                                                                                     | 9 ( 72,058)    | 12.49 [6.57;23.74]                                                            |
| Bavaria     | Oberbayern    | Traunstein County                                         | 36 ( 175,439)  | 20.52 [14.82;28.41]                              | 52 ( 176,271)  | 29.5 [22.5;38.68]                               | 94 ( 177,091)  | 53.08 [43.38;64.95]   | 35 ( 177,305)  | 19.74 [14.19;27.45]                                                                                    | 82 ( 177,336)  | 46.24 [37.26;57.39]                                                           |
| Bavaria     | Schwaben      | Unterallgäu County<br>Weilheim-Schongau<br>County         | 36 ( 141,176)  | 25.5 [18.42;35.3]                                | 24 ( 142,518)  | 16.84 [11.32;25.06]                             | 52 ( 144,044)  | 36.1 [27.53;47.33]    | 30 ( 145,349)  | 20.64 [14.46;29.46]                                                                                    | 24 ( 145,366)  | 16.51 [11.1;24.57]                                                            |
| Bavaria     | Oberbayern    | Weißenburg-<br>Gunzenhausen County                        | 39 ( 133,837)  | 29.14 [21.32;39.83]                              | 35 ( 134,254)  | 26.07 [18.75;36.25]                             | 58 ( 135,356)  | 42.85 [33.15;55.38]   | 31 ( 135,490)  | 22.88 [16.12;32.47]                                                                                    | 83 ( 135,488)  | 61.26 [49.43;75.93]                                                           |
| Bavaria     | Mittelfranken | Wunsiedel i.Fichtelgebirge<br>County                      | 43 ( 93,969)   | 45.76 [33.98;61.63]                              | 30 ( 94,221)   | 31.84 [22.3;45.45]                              | 30 ( 94,399)   | 31.78 [22.26;45.36]   | 32 ( 94,731)   | 33.78 [23.93;47.68]                                                                                    | 55 ( 94,730)   | 58.06 [44.61;75.56]                                                           |
| Bavaria     | Oberfranken   |                                                           | 27 ( 73,250)   | 36.86 [25.33;53.63]                              | 15 ( 73,493)   | 20.41 [12.37;33.67]                             | 14 ( 73,183)   | 19.13 [11.4;32.11]    | 14 ( 72,652)   | 19.27 [11.48;32.35]<br>110.29<br>[95.28;127.66]<br>111.74<br>[97.53;128.02]<br>89.58<br>[76.47;104.93] | 11 ( 72,655)   | 15.14 [8.45;27.11]                                                            |
| Bavaria     | Unterfranken  | Würzburg County                                           | 130 ( 161,051) | 80.72 [67.99;95.83]<br>105.37<br>[91.39;121.49]  | 125 ( 161,332) | 77.48 [65.04;92.3]<br>106.71<br>[92.69;122.85]  | 174 ( 161,830) | 107.52 [92.69;124.72] | 179 ( 162,299) |                                                                                                        | 145 ( 162,301) | 89.34 [75.94;105.1]                                                           |
| Brandenburg | Brandenburg   | Barnim County                                             | 189 ( 179,368) |                                                  | 193 ( 180,864) |                                                 | 183 ( 182,762) | 100.13 [86.64;115.72] | 207 ( 185,251) |                                                                                                        | 169 ( 185,246) | 91.23 [78.48;106.05]<br>104.81<br>[90.55;121.32]                              |
| Brandenburg | Brandenburg   | Dahme-Spreewald County                                    | 125 ( 166,069) | 75.27 [63.18;89.67]                              | 128 ( 167,320) | 76.5 [64.35;90.94]                              | 123 ( 169,072) | 72.75 [60.98;86.79]   | 153 ( 170,797) |                                                                                                        | 179 ( 170,785) |                                                                               |
| Brandenburg | Brandenburg   | Elbe-Elster County                                        | 36 ( 104,408)  | 34.48 [24.91;47.73]                              | 46 ( 103,464)  | 44.46 [33.34;59.29]                             | 17 ( 102,657)  | 16.56 [10.34;26.52]   | 17 ( 101,857)  | 16.69 [10.42;26.73]                                                                                    | 22 ( 101,805)  | 21.61 [14.27;32.72]                                                           |
| Brandenburg | Brandenburg   | Havelland County                                          | 10 ( 159,744)  | 6.26 [3.4;11.52]<br>86.08<br>[73.91;100.25]      | 93 ( 160,705)  | 57.87 [47.25;70.88]                             | 84 ( 161,912)  | 51.88 [41.91;64.22]   | 82 ( 162,989)  | 50.31 [40.54;62.44]                                                                                    | 87 ( 162,982)  | 53.38 [43.28;65.83]                                                           |
| Brandenburg | Brandenburg   | Märkisch-Oderland County                                  | 165 ( 191,682) |                                                  | 161 ( 192,930) | 83.45 [71.52;97.37]                             | 133 ( 194,331) | 68.44 [57.76;81.1]    | 148 ( 195,741) | 75.61 [64.37;88.81]                                                                                    | 85 ( 195,762)  | 43.42 [35.12;53.68]                                                           |
| Brandenburg | Brandenburg   | Oberhavel County<br>Oberspreewald-Lausitz<br>County       | 156 ( 208,640) | 74.77 [63.92;87.45]                              | 159 ( 209,901) | 75.75 [64.86;88.47]                             | 116 ( 211,255) | 54.91 [45.79;65.85]   | 148 ( 212,919) | 69.51 [59.18;81.64]                                                                                    | 176 ( 212,920) | 82.66 [71.32;95.8]                                                            |
| Brandenburg | Brandenburg   |                                                           | 34 ( 111,953)  | 30.37 [21.73;42.43]                              | 52 ( 111,111)  | 46.8 [35.69;61.36]                              | 66 ( 110,479)  | 59.74 [46.96;75.99]   | 52 ( 109,382)  | 47.54 [36.26;62.33]                                                                                    | 43 ( 109,359)  | 39.32 [29.19;52.96]                                                           |
| Brandenburg | Brandenburg   | Oder-Spree County                                         | 122 ( 178,859) | 68.21 [57.14;81.43]                              | 61 ( 178,363)  | 34.2 [26.63;43.92]                              | 101 ( 178,666) | 56.53 [46.53;68.68]   | 69 ( 178,803)  | 38.59 [30.5;48.83]                                                                                     | 76 ( 178,824)  | 42.5 [33.96;53.19]                                                            |
| Brandenburg | Brandenburg   | Ostprignitz-Ruppin County<br>Potsdam-Mittelmark<br>County | 55 ( 99,422)   | 55.32 [42.51;71.99]<br>104.61<br>[91.73;119.3]   | 34 ( 99,357)   | 34.22 [24.49;47.81]<br>113.03<br>[99.64;128.22] | 44 ( 99,077)   | 44.41 [33.09;59.61]   | 42 ( 98,870)   | 42.48 [31.43;57.41]                                                                                    | 38 ( 98,855)   | 38.44 [28.01;52.75]                                                           |
| Brandenburg | Brandenburg   |                                                           | 222 ( 212,217) | 149.08<br>[124.32;178.76]                        | 241 ( 213,218) | 146.25<br>[121.67;175.79]                       | 176 ( 214,660) | 81.99 [70.74;95.02]   | 157 ( 216,552) | 72.5 [62.01;84.76]<br>106.36<br>[85.59;132.16]                                                         | 150 ( 216,575) | 69.26 [59.03;81.26]<br>119.49<br>[97.34;146.67]                               |
| Brandenburg | Brandenburg   | Prignitz County                                           | 116 ( 77,811)  |                                                  | 113 ( 77,265)  |                                                 | 82 ( 76,507)   | 107.18 [86.36;133.01] | 81 ( 76,156)   |                                                                                                        | 91 ( 76,157)   |                                                                               |

|                        |                        |                                    |                |                        |                |                        |                |                        |                |                        |                |                       |
|------------------------|------------------------|------------------------------------|----------------|------------------------|----------------|------------------------|----------------|------------------------|----------------|------------------------|----------------|-----------------------|
| Brandenburg            | Brandenburg            | Spree-Neiße County                 | 47 ( 116,828)  | 40.23 [30.26;53.49]    | 41 ( 115,460)  | 35.51 [26.18;48.17]    | 47 ( 114,439)  | 41.07 [30.89;54.61]    | 33 ( 113,715)  | 29.02 [20.67;40.75]    | 35 ( 113,710)  | 30.78 [22.13;42.8]    |
| Brandenburg            | Brandenburg            | Teltow-Fläming County              | 104 ( 164,766) | 63.12 [52.1;76.47]     | 113 ( 166,888) | 67.71 [56.33;81.39]    | 77 ( 168,306)  | 45.75 [36.61;57.17]    | 71 ( 169,978)  | 41.77 [33.12;52.68]    | 84 ( 170,006)  | 49.41 [39.91;61.16]   |
| Brandenburg            | Brandenburg            | Uckermark County                   | 48 ( 120,876)  | 39.71 [29.95;52.64]    | 54 ( 120,348)  | 44.87 [34.39;58.54]    | 70 ( 119,556)  | 58.55 [46.35;73.96]    | 87 ( 118,950)  | 73.14 [59.3;90.2]      | 134 ( 118,942) | 112.66 [95.14;133.4]  |
| Mecklenburg-Vorpommern | Mecklenburg-Vorpommern | Ludwigslust-Parchim County         | 259 ( 212,556) | 121.85 [107.89;137.61] | 275 ( 212,519) | 129.4 [114.99;145.61]  | 287 ( 212,624) | 134.98 [120.25;151.51] | 160 ( 211,780) | 75.55 [64.72;88.19]    | 43 ( 211,823)  | 20.3 [15.07;27.34]    |
| Mecklenburg-Vorpommern | Mecklenburg-Vorpommern | Mecklenburgische Seenplatte County | 82 ( 261,814)  | 31.32 [25.24;38.87]    | 123 ( 260,593) | 47.2 [39.56;56.31]     | 68 ( 259,146)  | 26.24 [20.7;33.26]     | 58 ( 258,122)  | 22.47 [17.38;29.04]    | 68 ( 258,065)  | 26.35 [20.79;33.4]    |
| Mecklenburg-Vorpommern | Mecklenburg-Vorpommern | Nordwestmecklenburg County         | 191 ( 156,827) | 121.79 [105.71;140.32] | 216 ( 156,988) | 137.59 [120.43;157.19] | 200 ( 156,728) | 127.61 [111.12;146.55] | 190 ( 157,324) | 120.77 [104.78;139.19] | 179 ( 157,321) | 113.78 [98.3;131.7]   |
| Mecklenburg-Vorpommern | Mecklenburg-Vorpommern | Rostock County                     | 164 ( 213,932) | 76.66 [65.79;89.32]    | 157 ( 214,627) | 73.15 [62.57;85.52]    | 96 ( 215,102)  | 44.63 [36.55;54.49]    | 109 ( 215,799) | 50.51 [41.88;60.92]    | 160 ( 215,808) | 74.14 [63.51;86.55]   |
| Mecklenburg-Vorpommern | Mecklenburg-Vorpommern | Vorpommern-Greifswald County       | 54 ( 237,363)  | 22.75 [17.44;29.68]    | 74 ( 237,103)  | 31.21 [24.86;39.18]    | 39 ( 236,650)  | 16.48 [12.06;22.53]    | 62 ( 235,652)  | 26.31 [20.53;33.72]    | 80 ( 235,641)  | 33.95 [27.28;42.25]   |
| Mecklenburg-Vorpommern | Mecklenburg-Vorpommern | Vorpommern-Rügen County            | 59 ( 224,933)  | 26.23 [20.34;33.83]    | 88 ( 225,122)  | 39.09 [31.73;48.15]    | 68 ( 224,719)  | 30.26 [23.87;38.36]    | 88 ( 224,719)  | 39.16 [31.79;48.24]    | 70 ( 224,719)  | 31.15 [24.66;39.35]   |
| Rhineland-Palatinate   | Koblenz                | Ahrweiler County                   | 47 ( 128,450)  | 36.59 [27.52;48.65]    | 41 ( 128,931)  | 31.8 [23.44;43.13]     | 31 ( 129,707)  | 23.9 [16.84;33.92]     | 32 ( 130,081)  | 24.6 [17.43;34.72]     | 44 ( 130,101)  | 33.82 [25.2;45.39]    |
| Rhineland-Palatinate   | Koblenz                | Altenkirchen County                | 60 ( 128,949)  | 46.53 [36.15;59.88]    | 69 ( 128,779)  | 53.58 [42.34;67.8]     | 170 ( 128,700) | 132.09 [113.68;153.48] | 121 ( 128,806) | 93.94 [78.63;112.22]   | 161 ( 128,800) | 125 [107.13;145.84]   |
| Rhineland-Palatinate   | Rheinessen-Pfalz       | Alzey-Worms County                 | 17 ( 128,205)  | 13.26 [8.28;21.24]     | 10 ( 128,535)  | 7.78 [4.23;14.32]      | 17 ( 129,278)  | 13.15 [8.21;21.06]     | 7 ( 129,630)   | 5.4 [2.62;11.15]       | 6 ( 129,590)   | 4.63 [2.12;10.1]      |
| Rhineland-Palatinate   | Rheinessen-Pfalz       | Bad Dürkheim County                | 51 ( 132,951)  | 38.36 [29.18;50.43]    | 39 ( 132,743)  | 29.38 [21.49;40.16]    | 59 ( 132,674)  | 44.47 [34.48;57.35]    | 44 ( 132,690)  | 33.16 [24.7;44.51]     | 44 ( 132,690)  | 33.16 [24.7;44.51]    |
| Rhineland-Palatinate   | Koblenz                | Bad Kreuznach County               | 142 ( 157,393) | 90.22 [76.56;106.32]   | 107 ( 157,538) | 67.92 [56.22;82.06]    | 81 ( 158,080)  | 51.24 [41.23;63.68]    | 131 ( 158,346) | 82.73 [69.73;98.15]    | 141 ( 158,338) | 89.05 [75.52;105]     |
| Rhineland-Palatinate   | Trier                  | Bernkastel-Wittlich County         | 32 ( 112,006)  | 28.57 [20.24;40.33]    | 22 ( 112,130)  | 19.62 [12.96;29.71]    | 14 ( 112,269)  | 12.47 [7.43;20.93]     | 10 ( 112,486)  | 8.89 [4.83;16.37]      | 15 ( 112,444)  | 13.34 [8.08;22.01]    |
| Rhineland-Palatinate   | Koblenz                | Birkenfeld County                  | 73 ( 80,797)   | 90.35 [71.87;113.57]   | 64 ( 80,727)   | 79.28 [62.1;101.22]    | 62 ( 80,719)   | 76.81 [59.93;98.44]    | 54 ( 80,947)   | 66.71 [51.14;87.02]    | 95 ( 80,954)   | 117.35 [96.02;143.42] |
| Rhineland-Palatinate   | Trier                  | Bitburg-Prüm County                | 46 ( 98,018)   | 46.93 [35.19;62.59]    | 26 ( 98,224)   | 26.47 [18.07;38.78]    | 73 ( 98,555)   | 74.07 [58.92;93.11]    | 39 ( 99,060)   | 39.37 [28.8;53.81]     | 38 ( 99,062)   | 38.36 [27.95;52.64]   |
| Rhineland-Palatinate   | Koblenz                | Cochem-Zell County                 | 50 ( 61,866)   | 80.82 [61.31;106.52]   | 18 ( 61,665)   | 29.19 [18.47;46.14]    | 50 ( 61,584)   | 81.19 [61.59;107.01]   | 20 ( 61,369)   | 32.59 [21.1;50.34]     | 65 ( 61,373)   | 105.91 [83.11;134.95] |
| Rhineland-Palatinate   | Rheinessen-Pfalz       | Donnersbergkreis County            | 74 ( 75,203)   | 98.4 [78.4;123.5]      | 45 ( 75,100)   | 59.92 [44.79;80.16]    | 69 ( 75,098)   | 91.88 [72.61;116.25]   | 38 ( 75,322)   | 50.45 [36.76;69.23]    | 43 ( 75,320)   | 57.09 [42.39;76.88]   |
| Rhineland-Palatinate   | Rheinessen-Pfalz       | Germersheim County                 | 18 ( 128,205)  | 14.04 [8.88;22.19]     | 13 ( 128,458)  | 10.12 [5.91;17.32]     | 17 ( 129,081)  | 13.17 [8.22;21.09]     | 21 ( 128,993)  | 16.28 [10.65;24.89]    | 8 ( 129,032)   | 6.2 [3.14;12.23]      |
| Rhineland-Palatinate   | Rheinessen-Pfalz       | Kaiserslautern County              | 40 ( 105,513)  | 37.91 [27.84;51.61]    | 37 ( 105,654)  | 35.02 [25.41;48.26]    | 61 ( 106,050)  | 57.52 [44.79;73.87]    | 50 ( 105,977)  | 47.18 [35.79;62.19]    | 63 ( 105,971)  | 59.45 [46.47;76.05]   |
| Rhineland-Palatinate   | Rheinessen-Pfalz       | Kusel County                       | 47 ( 70,901)   | 66.29 [49.86;88.13]    | 25 ( 70,761)   | 35.33 [23.93;52.15]    | 50 ( 70,522)   | 70.9 [53.79;93.45]     | 48 ( 70,217)   | 68.36 [51.57;90.62]    | 49 ( 70,221)   | 69.78 [52.79;92.23]   |
| Rhineland-Palatinate   | Rheinessen-Pfalz       | Mainz-Bingen County                | 34 ( 209,231)  | 16.25 [11.63;22.71]    | 14 ( 209,895)  | 6.67 [3.97;11.2]       | 28 ( 210,843)  | 13.28 [9.19;19.19]     | 8 ( 211,640)   | 3.78 [1.92;7.46]       | 25 ( 211,506)  | 11.82 [8.01;17.45]    |
| Rhineland-Palatinate   | Koblenz                | Mayen-Koblenz County               | 55 ( 212,931)  | 25.83 [19.85;33.62]    | 27 ( 213,608)  | 12.64 [8.69;18.39]     | 62 ( 214,236)  | 28.94 [22.58;37.09]    | 36 ( 214,413)  | 16.79 [12.13;23.24]    | 44 ( 214,425)  | 20.52 [15.29;27.54]   |
| Rhineland-Palatinate   | Koblenz                | Neuwied County                     | 52 ( 181,564)  | 28.64 [21.84;37.55]    | 47 ( 181,678)  | 25.87 [19.46;34.4]     | 69 ( 181,962)  | 37.92 [29.97;47.98]    | 49 ( 182,836)  | 26.8 [20.27;35.43]     | 52 ( 182,841)  | 28.44 [21.69;37.29]   |
| Rhineland-Palatinate   | Koblenz                | Rhein-Hunsrück-Kreis County        | 73 ( 103,020)  | 70.86 [56.37;89.08]    | 49 ( 102,941)  | 47.6 [36.01;62.92]     | 44 ( 102,948)  | 42.74 [31.84;57.37]    | 32 ( 103,159)  | 31.02 [21.97;43.79]    | 62 ( 103,161)  | 60.1 [46.89;77.03]    |
| Rhineland-Palatinate   | Koblenz                | Rhein-Lahn-Kreis County            | 104 ( 122,555) | 84.86 [70.05;102.8]    | 74 ( 122,375)  | 60.47 [48.18;75.9]     | 77 ( 122,300)  | 62.96 [50.38;78.67]    | 45 ( 122,283)  | 36.8 [27.51;49.23]     | 57 ( 122,291)  | 46.61 [35.98;60.38]   |
| Rhineland-Palatinate   | Rheinessen-Pfalz       | Rhein-Pfalz-Kreis County           | 70 ( 153,039)  | 45.74 [36.21;57.78]    | 20 ( 153,610)  | 13.02 [8.43;20.11]     | 24 ( 154,242)  | 15.56 [10.46;23.15]    | 26 ( 154,578)  | 16.82 [11.48;24.65]    | 10 ( 154,560)  | 6.47 [3.51;11.91]     |
| Rhineland-Palatinate   | Rheinessen-Pfalz       | Südliche Weinstraße County         | 47 ( 110,875)  | 42.39 [31.88;56.36]    | 64 ( 110,631)  | 57.85 [45.31;73.86]    | 66 ( 110,349)  | 59.81 [47.02;76.08]    | 56 ( 110,519)  | 50.67 [39.03;65.79]    | 45 ( 110,511)  | 40.72 [30.44;54.48]   |
| Rhineland-Palatinate   | Rheinessen-Pfalz       | Südwestpfalz County                | 51 ( 95,955)   | 53.15 [40.43;69.87]    | 33 ( 95,486)   | 34.56 [24.61;48.53]    | 62 ( 95,107)   | 65.19 [50.86;83.55]    | 29 ( 94,833)   | 30.58 [21.29;43.91]    | 52 ( 94,839)   | 54.83 [41.82;71.89]   |

|                      |               |                                         |                |                        |                |                       |                |                        |                |                        |                |                        |
|----------------------|---------------|-----------------------------------------|----------------|------------------------|----------------|-----------------------|----------------|------------------------|----------------|------------------------|----------------|------------------------|
| Rhineland-Palatinate | Trier         | Trier-Saarburg County                   | 26 ( 147,811)  | 17.59 [12;25.77]       | 26 ( 148,571)  | 17.5 [11.94;25.64]    | 37 ( 148,953)  | 24.84 [18.02;34.23]    | 36 ( 149,378)  | 24.1 [17.41;33.36]     | 40 ( 149,421)  | 26.77 [19.66;36.45]    |
| Rhineland-Palatinate | Trier         | Vulkaneifel County                      | 82 ( 60,759)   | 134.96 [108.75;167.47] | 51 ( 60,707)   | 84.01 [63.91;110.43]  | 88 ( 60,602)   | 145.21 [117.89;178.85] | 52 ( 60,648)   | 85.74 [65.39;112.41]   | 86 ( 60,645)   | 141.81 [114.85;175.08] |
| Rhineland-Palatinate | Koblenz       | Westerwaldkreis County                  | 78 ( 201,031)  | 38.8 [31.09;48.42]     | 70 ( 201,034)  | 34.82 [27.56;43.99]   | 80 ( 201,613)  | 39.68 [31.89;49.38]    | 61 ( 201,920)  | 30.21 [23.52;38.8]     | 97 ( 201,915)  | 48.04 [39.39;58.6]     |
| Saarland             | Saarland      | Merzig-Wadern County                    | 21 ( 103,909)  | 20.21 [13.22;30.9]     | 22 ( 103,676)  | 21.22 [14.01;32.13]   | 20 ( 103,359)  | 19.35 [12.53;29.89]    | 31 ( 103,230)  | 30.03 [21.16;42.62]    | 25 ( 103,263)  | 24.21 [16.4;35.74]     |
| Saarland             | Saarland      | Neunkirchen County                      | 22 ( 133,983)  | 16.42 [10.84;24.86]    | 17 ( 133,333)  | 12.75 [7.96;20.42]    | 31 ( 132,196)  | 23.45 [16.52;33.28]    | 32 ( 131,417)  | 24.35 [17.25;34.37]    | 4 ( 131,579)   | 3.04 [1.18;7.82]       |
| Saarland             | Saarland      | Saar-Pfalz-Kreis County                 | 33 ( 144,105)  | 22.9 [16.31;32.16]     | 35 ( 143,384)  | 24.41 [17.55;33.94]   | 68 ( 142,617)  | 47.68 [37.62;60.43]    | 39 ( 142,180)  | 27.43 [20.07;37.49]    | 51 ( 142,180)  | 35.87 [27.29;47.15]    |
| Saarland             | Saarland      | Saarlouis County                        | 13 ( 196,672)  | 6.61 [3.86;11.31]      | 34 ( 195,853)  | 17.36 [12.42;24.26]   | 71 ( 195,216)  | 36.37 [28.84;45.87]    | 72 ( 194,332)  | 37.05 [29.42;46.65]    | 83 ( 194,334)  | 42.71 [34.46;52.94]    |
| Saarland             | Saarland      | Sankt Wendel County                     | 48 ( 88,463)   | 54.26 [40.93;71.93]    | 46 ( 87,870)   | 52.35 [39.25;69.81]   | 102 ( 87,396)  | 116.71 [96.16;141.64]  | 79 ( 87,004)   | 90.8 [72.87;113.14]    | 107 ( 87,006)  | 122.98 [101.79;148.57] |
| Saarland             | Saarland      | Stadtverband Saarbrücken County         | 60 ( 329,670)  | 18.2 [14.14;23.42]     | 42 ( 330,189)  | 12.72 [9.41;17.19]    | 83 ( 329,758)  | 25.17 [20.31;31.2]     | 35 ( 328,638)  | 10.65 [7.66;14.81]     | 62 ( 328,738)  | 18.86 [14.71;24.17]    |
| Saxony               | Dresden       | Bautzen County                          | 116 ( 304,702) | 38.07 [31.74;45.65]    | 128 ( 302,600) | 42.3 [35.58;50.29]    | 140 ( 300,881) | 46.53 [39.44;54.9]     | 100 ( 299,760) | 33.36 [27.43;40.57]    | 74 ( 299,716)  | 24.69 [19.67;30.99]    |
| Saxony               | Chemnitz      | Erzgebirgskreis County                  | 262 ( 344,148) | 76.13 [67.46;85.92]    | 219 ( 340,379) | 64.34 [56.37;73.44]   | 236 ( 337,673) | 69.89 [61.53;79.39]    | 337 ( 334,957) | 100.61 [90.43;111.93]  | 247 ( 334,961) | 73.74 [65.1;83.52]     |
| Saxony               | Leipzig       | Leipzig County                          | 70 ( 258,303)  | 27.1 [21.45;34.23]     | 72 ( 257,972)  | 27.91 [22.17;35.14]   | 84 ( 257,748)  | 32.59 [26.33;40.34]    | 104 ( 258,129) | 40.29 [33.26;48.81]    | 83 ( 258,165)  | 32.15 [25.94;39.85]    |
| Saxony               | Dresden       | Meißen County                           | 157 ( 243,902) | 64.37 [55.06;75.25]    | 155 ( 242,871) | 63.82 [54.54;74.68]   | 137 ( 242,178) | 56.57 [47.86;66.87]    | 147 ( 241,737) | 60.81 [51.74;71.46]    | 109 ( 241,739) | 45.09 [37.38;54.38]    |
| Saxony               | Chemnitz      | Mittelsachsen County                    | 223 ( 310,498) | 71.82 [62.99;81.88]    | 195 ( 308,154) | 63.28 [55;72.8]       | 241 ( 306,187) | 78.71 [69.38;89.29]    | 238 ( 304,114) | 78.26 [68.93;88.85]    | 163 ( 304,104) | 53.6 [45.98;62.48]     |
| Saxony               | Leipzig       | Nordsachsen County                      | 30 ( 198,020)  | 15.15 [10.61;21.63]    | 37 ( 197,755)  | 18.71 [13.58;25.79]   | 42 ( 197,647)  | 21.25 [15.72;28.72]    | 35 ( 197,740)  | 17.7 [12.73;24.61]     | 24 ( 197,694)  | 12.14 [8.16;18.06]     |
| Saxony               | Dresden       | Sächsische Schweiz-Osterzgebirge County | 340 ( 246,074) | 138.17 [124.25;153.65] | 288 ( 245,420) | 117.35 [104.56;131.7] | 307 ( 245,620) | 124.99 [111.78;139.76] | 279 ( 245,577) | 113.61 [101.04;127.74] | 309 ( 245,589) | 125.82 [112.56;140.64] |
| Saxony               | Chemnitz      | Vogtlandkreis County                    | 191 ( 231,039) | 82.67 [71.75;95.25]    | 174 ( 229,582) | 75.79 [65.34;87.91]   | 220 ( 227,790) | 96.58 [84.64;110.21]   | 263 ( 226,003) | 116.37 [103.14;131.3]  | 183 ( 226,010) | 80.97 [70.06;93.58]    |
| Saxony               | Chemnitz      | Zwickau County                          | 63 ( 322,086)  | 19.56 [15.29;25.02]    | 59 ( 319,957)  | 18.44 [14.3;23.78]    | 51 ( 317,559)  | 16.06 [12.22;21.11]    | 79 ( 314,992)  | 25.08 [20.13;31.25]    | 88 ( 314,961)  | 27.94 [22.68;34.42]    |
| Saxony-Anhalt        | Saxony-Anhalt | Altmarkkreis Salzwedel County           | 11 ( 85,205)   | 12.91 [7.21;23.12]     | 12 ( 84,448)   | 14.21 [8.13;24.84]    | 20 ( 83,752)   | 23.88 [15.46;36.88]    | 18 ( 83,179)   | 21.64 [13.69;34.21]    | 16 ( 83,160)   | 19.24 [11.84;31.25]    |
| Saxony-Anhalt        | Saxony-Anhalt | Anhalt-Bitterfeld County                | 6 ( 163,043)   | 3.68 [1.69;8.03]       | 11 ( 161,290)  | 6.82 [3.81;12.21]     | 3 ( 159,574)   | 1.88 [0.64;5.53]       | 8 ( 158,416)   | 5.05 [2.56;9.97]       | 13 ( 158,537)  | 8.2 [4.79;14.03]       |
| Saxony-Anhalt        | Saxony-Anhalt | Börde County                            | 110 ( 172,956) | 63.6 [52.78;76.64]     | 125 ( 172,628) | 72.41 [60.78;86.26]   | 135 ( 171,734) | 78.61 [66.42;93.03]    | 127 ( 170,929) | 74.3 [62.46;88.39]     | 116 ( 170,915) | 67.87 [56.59;81.39]    |
| Saxony-Anhalt        | Saxony-Anhalt | Burgenlandkreis County                  | 6 ( 182,927)   | 3.28 [1.5;7.16]        | 7 ( 181,818)   | 3.85 [1.86;7.95]      | 5 ( 180,505)   | 2.77 [1.18;6.48]       | 6 ( 179,104)   | 3.35 [1.54;7.31]       | 2 ( 178,571)   | 1.12 [0.31;4.08]       |
| Saxony-Anhalt        | Saxony-Anhalt | Harz County                             | 4 ( 219,780)   | 1.82 [0.71;4.68]       | 24 ( 216,216)  | 11.1 [7.46;16.52]     | 28 ( 214,395)  | 13.06 [9.04;18.87]     | 15 ( 213,371)  | 7.03 [4.26;11.6]       | 11 ( 213,178)  | 5.16 [2.88;9.24]       |
| Saxony-Anhalt        | Saxony-Anhalt | Jerichower Land County                  | 45 ( 91,352)   | 49.26 [36.82;65.9]     | 31 ( 90,458)   | 34.27 [24.15;48.64]   | 39 ( 89,924)   | 43.37 [31.73;59.28]    | 48 ( 89,586)   | 53.58 [40.42;71.03]    | 48 ( 89,586)   | 53.58 [40.42;71.03]    |
| Saxony-Anhalt        | Saxony-Anhalt | Mansfeld-Südharz County                 | 46 ( 139,775)  | 32.91 [24.68;43.89]    | 37 ( 138,008)  | 26.81 [19.45;36.95]   | 20 ( 136,240)  | 14.68 [9.5;22.68]      | 31 ( 134,959)  | 22.97 [16.18;32.6]     | 49 ( 134,949)  | 36.31 [27.47;48]       |
| Saxony-Anhalt        | Saxony-Anhalt | Saalekreis County                       | 45 ( 185,950)  | 24.2 [18.09;32.38]     | 41 ( 185,520)  | 22.1 [16.29;29.98]    | 18 ( 184,615)  | 9.75 [6.17;15.41]      | 24 ( 183,767)  | 13.06 [8.78;19.43]     | 16 ( 183,908)  | 8.7 [5.36;14.13]       |
| Saxony-Anhalt        | Saxony-Anhalt | Salzlandkreis County                    | 97 ( 194,584)  | 49.85 [40.87;60.8]     | 117 ( 192,751) | 60.7 [50.65;72.74]    | 118 ( 190,568) | 61.92 [51.71;74.14]    | 107 ( 189,113) | 56.58 [46.83;68.36]    | 141 ( 189,135) | 74.55 [63.22;87.91]    |
| Saxony-Anhalt        | Saxony-Anhalt | Stendal County                          | 15 ( 114,416)  | 13.11 [7.95;21.63]     | 25 ( 113,173)  | 22.09 [14.96;32.61]   | 26 ( 111,972)  | 23.22 [15.85;34.02]    | 15 ( 111,193)  | 13.49 [8.18;22.26]     | 25 ( 111,210)  | 22.48 [15.23;33.18]    |
| Saxony-Anhalt        | Saxony-Anhalt | Wittenberg County                       | 18 ( 127,479)  | 14.12 [8.93;22.32]     | 11 ( 126,874)  | 8.67 [4.84;15.53]     | 13 ( 125,847)  | 10.33 [6.04;17.67]     | 9 ( 125,000)   | 7.2 [3.79;13.68]       | 6 ( 125,000)   | 4.8 [2.2;10.47]        |
| Thuringia            | Thuringia     | Altenburger Land County                 | 13 ( 91,614)   | 14.19 [8.29;24.28]     | 8 ( 90,600)    | 8.83 [4.47;17.42]     | 18 ( 90,135)   | 19.97 [12.63;31.57]    | 16 ( 89,385)   | 17.9 [11.02;29.08]     | 18 ( 89,374)   | 20.14 [12.74;31.84]    |

|           |           |                               |               |                     |               |                     |               |                     |               |                     |               |                     |
|-----------|-----------|-------------------------------|---------------|---------------------|---------------|---------------------|---------------|---------------------|---------------|---------------------|---------------|---------------------|
| Thuringia | Thuringia | Eichsfeld County              | 4 ( 101,010)  | 3.96 [1.54;10.18]   | 3 ( 100,671)  | 2.98 [1.01;8.76]    | 3 ( 100,334)  | 2.99 [1.02;8.79]    | NA ( NA)      | NA [NA;NA]          | NA ( NA)      | NA [NA;NA]          |
| Thuringia | Thuringia | Gotha County                  | 26 ( 135,417) | 19.2 [13.1;28.13]   | 24 ( 135,517) | 17.71 [11.9;26.35]  | 35 ( 135,449) | 25.84 [18.58;35.93] | 17 ( 134,921) | 12.6 [7.87;20.18]   | 16 ( 134,907) | 11.86 [7.3;19.27]   |
| Thuringia | Thuringia | Greiz County                  | 24 ( 99,709)  | 24.07 [16.18;35.81] | 25 ( 99,285)  | 25.18 [17.06;37.17] | 24 ( 98,160)  | 24.45 [16.43;36.38] | 27 ( 97,403)  | 27.72 [19.05;40.33] | 24 ( 97,403)  | 24.64 [16.56;36.66] |
| Thuringia | Thuringia | Hildburghausen County         | 23 ( 64,336)  | 35.75 [23.82;53.64] | 30 ( 63,925)  | 46.93 [32.88;66.99] | 22 ( 63,547)  | 34.62 [22.86;52.42] | 30 ( 63,198)  | 47.47 [33.25;67.76] | 27 ( 63,202)  | 42.72 [29.36;62.15] |
| Thuringia | Thuringia | Ilm-Kreis County              | 72 ( 109,174) | 65.95 [52.38;83.04] | 43 ( 108,833) | 39.51 [29.34;53.21] | 68 ( 108,748) | 62.53 [49.33;79.26] | 53 ( 106,255) | 49.88 [38.14;65.23] | 41 ( 106,245) | 38.59 [28.45;52.34] |
| Thuringia | Thuringia | Kyffhäuserkreis County        | 6 ( 76,726)   | 7.82 [3.58;17.06]   | 3 ( 75,758)   | 3.96 [1.35;11.64]   | 2 ( 74,906)   | 2.67 [0.73;9.74]    | 1 ( 74,074)   | 1.35 [0.24;7.65]    | 1 ( 74,074)   | 1.35 [0.24;7.65]    |
| Thuringia | Thuringia | Nordhausen County             | 33 ( 85,095)  | 38.78 [27.62;54.45] | 36 ( 84,706)  | 42.5 [30.7;58.83]   | 33 ( 83,820)  | 39.37 [28.04;55.28] | 16 ( 83,420)  | 19.18 [11.81;31.16] | 12 ( 83,391)  | 14.39 [8.23;25.15]  |
| Thuringia | Thuringia | Saale-Holzland-Kreis County   | 23 ( 84,528)  | 27.21 [18.13;40.83] | 17 ( 83,008)  | 20.48 [12.79;32.8]  | 27 ( 83,051)  | 32.51 [22.34;47.3]  | 23 ( 82,943)  | 27.73 [18.48;41.61] | 20 ( 82,953)  | 24.11 [15.61;37.24] |
| Thuringia | Thuringia | Saale-Orla-Kreis County       | 30 ( 82,372)  | 36.42 [25.51;51.99] | 25 ( 81,513)  | 30.67 [20.78;45.27] | 56 ( 80,866)  | 69.25 [53.34;89.91] | 50 ( 80,308)  | 62.26 [47.23;82.06] | 28 ( 80,321)  | 34.86 [24.12;50.38] |
| Thuringia | Thuringia | Saalfeld-Rudolstadt County    | 86 ( 108,312) | 79.4 [64.3;98.04]   | 72 ( 107,367) | 67.06 [53.26;84.43] | 74 ( 106,352) | 69.58 [55.43;87.33] | 62 ( 103,196) | 60.08 [46.87;77]    | 84 ( 103,194) | 81.4 [65.76;100.76] |
| Thuringia | Thuringia | Schmalkalden-Meiningen County | 30 ( 123,508) | 24.29 [17.02;34.67] | 23 ( 122,929) | 18.71 [12.47;28.08] | 31 ( 122,336) | 25.34 [17.85;35.97] | 35 ( 124,911) | 28.02 [20.15;38.96] | 41 ( 124,924) | 32.82 [24.2;44.52]  |
| Thuringia | Thuringia | Sömmerda County               | 10 ( 70,126)  | 14.26 [7.75;26.25]  | 4 ( 70,053)   | 5.71 [2.22;14.68]   | 4 ( 69,686)   | 5.74 [2.23;14.76]   | 3 ( 69,444)   | 4.32 [1.47;12.7]    | 1 ( 69,444)   | 1.44 [0.25;8.16]    |
| Thuringia | Thuringia | Sonneberg County              | 18 ( 56,515)  | 31.85 [20.15;50.34] | 22 ( 56,367)  | 39.03 [25.78;59.09] | 28 ( 56,191)  | 49.83 [34.48;72.01] | 29 ( 57,711)  | 50.25 [34.99;72.16] | 21 ( 57,724)  | 36.38 [23.8;55.61]  |
| Thuringia | Thuringia | Unstrut-Hainich-Kreis County  | 4 ( 103,896)  | 3.85 [1.5;9.9]      | 11 ( 103,481) | 10.63 [5.94;19.04]  | 7 ( 102,941)  | 6.8 [3.29;14.04]    | 7 ( 102,190)  | 6.85 [3.32;14.14]   | 11 ( 102,230) | 10.76 [6.01;19.27]  |
| Thuringia | Thuringia | Wartburgkreis County          | 22 ( 124,717) | 17.64 [11.65;26.71] | 13 ( 123,810) | 10.5 [6.14;17.97]   | 13 ( 122,990) | 10.57 [6.18;18.09]  | 10 ( 118,906) | 8.41 [4.57;15.48]   | 13 ( 118,939) | 10.93 [6.39;18.7]   |
| Thuringia | Thuringia | Weimarer Land County          | 18 ( 82,305)  | 21.87 [13.83;34.57] | 6 ( 82,079)   | 7.31 [3.35;15.95]   | 3 ( 81,967)   | 3.66 [1.24;10.76]   | 4 ( 82,136)   | 4.87 [1.89;12.52]   | 7 ( 82,160)   | 8.52 [4.13;17.59]   |
