# Supplementary material for: Incidence of Lyme Borreliosis in Germany: Exploring Observed Trends Over Time Using Public Surveillance Data, 2016–2020
Source: PubMed Central journal article supplement (PMC10122258; doi:10.1089/vbz.2022.0046), 2023-04-12
Supplement: Supp_TableS4.pdf [file Supp_TableS4.pdf]

**Table S4. Cases and incidence (per 100,000 person-time,  $\pm$  95% CI) of overall Lyme borreliosis notified by year and by German cities**

**NUTS3, yearly 2016–2020.**

| State/ NUTS1         | Region/ NUTS2     | City                            | 2016               |                                 | 2017               |                                | 2018               |                                  | 2019               |                                  | 2020               |                        |
|----------------------|-------------------|---------------------------------|--------------------|---------------------------------|--------------------|--------------------------------|--------------------|----------------------------------|--------------------|----------------------------------|--------------------|------------------------|
|                      |                   |                                 | Cases (population) | Incidence [95% CI]              | Cases (population) | Incidence [95% CI]             | Cases (population) | Incidence [95% CI]               | Cases (population) | Incidence [95% CI]               | Cases (population) | Incidence [95% CI]     |
| Thuringia            | Thuringia         | City of Weimar                  | 13 ( 64,356)       | 20.2 [ 11.81;34.56]<br>129.18 [ | 7 ( 64,397)        | 10.87 [ 5.27;22.44]<br>85.31 [ | 14 ( 65,086)       | 21.51 [ 12.81;36.11]<br>100.47 [ | 20 ( 65,232)       | 30.66 [ 19.85;47.36]<br>141.35 [ | 19 ( 65,225)       | 29.13 [ 18.65;45.5]    |
| Thuringia            | Thuringia         | City of Suhl                    | 46 ( 35,609)       | 96.87;172.25]                   | 30 ( 35,166)       | 59.77;121.76]                  | 35 ( 34,836)       | 72.25;139.69]                    | 52 ( 36,788)       | 107.81;185.3]                    | 48 ( 36,790)       | 130.47 [ 98.43;172.93] |
| Thuringia            | Thuringia         | City of Jena                    | 28 ( 110,323)      | 25.38 [ 17.56;36.68]            | 21 ( 111,111)      | 18.9 [ 12.36;28.89]            | 28 ( 111,421)      | 25.13 [ 17.39;36.32]             | 23 ( 111,326)      | 20.66 [ 13.77;31]                | 17 ( 111,329)      | 15.27 [ 9.53;24.45]    |
| Thuringia            | Thuringia         | City of Gera                    | 16 ( 94,731)       | 16.89 [ 10.4;27.44]             | 13 ( 94,891)       | 13.7 [ 8.01;23.44]             | 13 ( 94,135)       | 13.81 [ 8.07;23.63]              | 20 ( 93,110)       | 21.48 [ 13.91;33.18]             | 21 ( 93,126)       | 22.55 [ 14.75;34.47]   |
| Thuringia            | Thuringia         | City of Erfurt                  | 5 ( 210,970)       | 2.37 [ 1.01;5.55]               | 6 ( 212,766)       | 2.82 [ 1.29;6.15]              | 14 ( 213,740)      | 6.55 [ 3.9;11]                   | 15 ( 213,980)      | 7.01 [ 4.25;11.57]               | 2 ( 215,054)       | 0.93 [ 0.26;3.39]      |
| Thuringia            | Thuringia         | City of Eisenach                | 17 ( 42,585)       | 39.92 [ 24.93;63.93]            | 8 ( 42,712)        | 18.73 [ 9.49;36.96]            | 13 ( 42,373)       | 30.68 [ 17.93;52.49]             | 22 ( 42,251)       | 52.07 [ 34.39;78.83]             | 11 ( 42,243)       | 26.04 [ 14.54;46.63]   |
| Saxony-Anhalt        | Saxony-Anhalt     | City of Magdeburg               | 69 ( 238,095)      | 28.98 [ 22.9;36.67]             | 84 ( 238,501)      | 35.22 [ 28.45;43.6]            | 60 ( 238,663)      | 25.14 [ 19.53;32.36]             | 71 ( 237,538)      | 29.89 [ 23.7;37.7]               | 4 ( 238,095)       | 1.68 [ 0.65;4.32]      |
| Saxony-Anhalt        | Saxony-Anhalt     | City of Halle                   | 23 ( 238,095)      | 9.66 [ 6.44;14.5]               | 39 ( 239,117)      | 16.31 [ 11.93;22.29]           | 35 ( 239,234)      | 14.63 [ 10.52;20.35]             | 21 ( 238,636)      | 8.8 [ 5.76;13.45]                | 45 ( 238,727)      | 18.85 [ 14.09;25.22]   |
| Saxony-Anhalt        | Saxony-Anhalt     | City of Dessau-Roßlau           | 11 ( 82,521)       | 13.33 [ 7.44;23.87]             | 9 ( 82,117)        | 10.96 [ 5.77;20.83]            | 10 ( 81,235)       | 12.31 [ 6.69;22.66]              | 3 ( 80,000)        | 3.75 [ 1.28;11.03]               | 10 ( 80,128)       | 12.48 [ 6.78;22.97]    |
| Saxony               | Leipzig           | City of Leipzig                 | 65 ( 571,178)      | 11.38 [ 8.93;14.5]              | 51 ( 582,192)      | 8.76 [ 6.66;11.52]             | 62 ( 587,678)      | 10.55 [ 8.23;13.52]              | 75 ( 593,354)      | 12.64 [ 10.08;15.84]             | 40 ( 593,472)      | 6.74 [ 4.95;9.18]      |
| Saxony               | Dresden           | City of Görlitz                 | 64 ( 258,377)      | 24.77 [ 19.4;31.63]             | 74 ( 256,588)      | 28.84 [ 22.98;36.2]            | 158 ( 254,880)     | 61.99 [ 53.05;72.43]             | 180 ( 252,738)     | 71.22 [ 61.55;82.41]             | 61 ( 252,693)      | 24.14 [ 18.8;31]       |
| Saxony               | Dresden           | City of Dresden                 | 310 ( 547,220)     | 56.65 [ 50.69;63.31]            | 295 ( 551,093)     | 53.53 [ 47.76;59.99]           | 309 ( 554,658)     | 55.71 [ 49.84;62.28]             | 290 ( 556,729)     | 52.09 [ 46.43;58.44]             | 355 ( 556,775)     | 63.76 [ 57.47;70.74]   |
| Saxony               | Chemnitz          | City of Chemnitz                | 166 ( 246,364)     | 67.38 [ 57.88;78.43]            | 120 ( 246,863)     | 48.61 [ 40.66;58.12]           | 159 ( 247,240)     | 64.31 [ 55.06;75.11]             | 182 ( 246,345)     | 73.88 [ 63.9;85.42]              | 73 ( 246,372)      | 29.63 [ 23.57;37.25]   |
| Rhineland-Palatinate | Rheinhausen-Pfalz | City of Zweibrücken             | 11 ( 34,429)       | 31.95 [ 17.84;57.21]            | 7 ( 34,263)        | 20.43 [ 9.9;42.17]             | 18 ( 34,208)       | 52.62 [ 33.29;83.17]             | 10 ( 34,188)       | 29.25 [ 15.89;53.84]             | 12 ( 34,198)       | 35.09 [ 20.07;61.33]   |
| Rhineland-Palatinate | Rheinhausen-Pfalz | City of Worms                   | 8 ( 82,559)        | 9.69 [ 4.91;19.12]              | 1 ( 83,333)        | 1.2 [ 0.21;6.8]                | 2 ( 83,333)        | 2.4 [ 0.66;8.75]                 | 2 ( 83,682)        | 2.39 [ 0.66;8.71]                | 2 ( 83,682)        | 2.39 [ 0.66;8.71]      |
| Rhineland-Palatinate | Trier             | City of Trier                   | 13 ( 110,076)      | 11.81 [ 6.9;20.21]              | 4 ( 109,890)       | 3.64 [ 1.42;9.36]              | 9 ( 110,701)       | 8.13 [ 4.28;15.45]               | 12 ( 111,524)      | 10.76 [ 6.16;18.81]              | 10 ( 111,483)      | 8.97 [ 4.87;16.51]     |
| Rhineland-Palatinate | Rheinhausen-Pfalz | City of Speyer                  | NA ( NA)           | NA [ NA;NA]                     | 1 ( 51,020)        | 1.96 [ 0.35;11.1]              | 1 ( 50,505)        | 1.98 [ 0.35;11.22]               | 3 ( 50,590)        | 5.93 [ 2.02;17.44]               | 3 ( 50,590)        | 5.93 [ 2.02;17.44]     |
| Rhineland-Palatinate | Rheinhausen-Pfalz | City of Pirmasens               | 7 ( 40,416)        | 17.32 [ 8.39;35.75]             | 2 ( 40,650)        | 4.92 [ 1.35;17.94]             | 19 ( 40,400)       | 47.03 [ 30.11;73.45]             | 10 ( 40,225)       | 24.86 [ 13.5;45.76]              | 10 ( 40,225)       | 24.86 [ 13.5;45.76]    |
| Rhineland-Palatinate | Rheinhausen-Pfalz | City of Neustadt a.d.Weinstraße | 7 ( 53,191)        | 13.16 [ 6.37;27.16]             | 8 ( 53,369)        | 14.99 [ 7.6;29.58]             | 14 ( 53,151)       | 26.34 [ 15.69;44.21]             | 4 ( 53,262)        | 7.51 [ 2.92;19.31]               | 4 ( 53,262)        | 7.51 [ 2.92;19.31]     |
| Rhineland-Palatinate | Rheinhausen-Pfalz | City of Mainz                   | 17 ( 213,568)      | 7.96 [ 4.97;12.75]              | 17 ( 215,190)      | 7.9 [ 4.93;12.65]              | 29 ( 217,066)      | 13.36 [ 9.3;19.19]               | 25 ( 218,531)      | 11.44 [ 7.75;16.89]              | 15 ( 218,659)      | 6.86 [ 4.16;11.32]     |
| Rhineland-Palatinate | Rheinhausen-Pfalz | City of Ludwigshafen            | 2 ( 166,667)       | 1.2 [ 0.33;4.38]                | 13 ( 168,394)      | 7.72 [ 4.51;13.21]             | 32 ( 171,032)      | 18.71 [ 13.25;26.41]             | 15 ( 172,216)      | 8.71 [ 5.28;14.37]               | 43 ( 172,276)      | 24.96 [ 18.53;33.62]   |
| Rhineland-Palatinate | Rheinhausen-Pfalz | City of Landau i.d.Pfalz        | 2 ( 45,977)        | 4.35 [ 1.19;15.86]              | 2 ( 46,296)        | 4.32 [ 1.18;15.75]             | 3 ( 46,656)        | 6.43 [ 2.19;18.9]                | 8 ( 46,893)        | 17.06 [ 8.64;33.66]              | 6 ( 46,875)        | 12.8 [ 5.87;27.93]     |
| Rhineland-Palatinate | Koblenz           | City of Koblenz                 | 6 ( 113,636)       | 5.28 [ 2.42;11.52]              | 1 ( 113,636)       | 0.88 [ 0.16;4.98]              | 4 ( 113,960)       | 3.51 [ 1.36;9.03]                | 4 ( 113,960)       | 3.51 [ 1.36;9.03]                | 6 ( 114,068)       | 5.26 [ 2.41;11.48]     |
| Rhineland-Palatinate | Rheinhausen-Pfalz | City of Kaiserslautern          | 29 ( 99,315)       | 29.2 [ 20.33;41.93]             | 31 ( 99,678)       | 31.1 [ 21.91;44.14]            | 54 ( 99,852)       | 54.08 [ 41.45;70.55]             | 42 ( 100,024)      | 41.99 [ 31.07;56.75]             | 50 ( 100,020)      | 49.99 [ 37.92;65.89]   |

|                        |                        |                                           |                 |                         |                 |                        |                  |                         |                 |                       |                  |                         |
|------------------------|------------------------|-------------------------------------------|-----------------|-------------------------|-----------------|------------------------|------------------|-------------------------|-----------------|-----------------------|------------------|-------------------------|
| Rhineland-Palatinate   | Rheinessen-Pfalz       | City of Frankenthal                       | NA ( NA)        | NA [ NA;NA]             | 6 ( 48,426)     | 12.39 [ 5.68;27.03]    | 4 ( 48,544)      | 8.24 [ 3.2;21.19]       | 5 ( 48,780)     | 10.25 [ 4.38;23.99]   | 7 ( 48,747)      | 14.36 [ 6.96;29.64]     |
| Mecklenburg-Vorpommern | Mecklenburg-Vorpommern | City of Schwerin                          | 139 ( 95,671)   | 145.29 [ 123.07;171.51] | 136 ( 95,795)   | 141.97 [ 120.04;167.9] | 85 ( 95,818)     | 88.71 [ 71.76;109.67]   | 75 ( 95,651)    | 78.41 [ 62.56;98.27]  | 26 ( 95,659)     | 27.18 [ 18.55;39.82]    |
| Mecklenburg-Vorpommern | Mecklenburg-Vorpommern | City of Rostock                           | 25 ( 207,469)   | 12.05 [ 8.16;17.79]     | 18 ( 208,333)   | 8.64 [ 5.47;13.66]     | 9 ( 208,817)     | 4.31 [ 2.27;8.19]       | 60 ( 209,205)   | 28.68 [ 22.28;36.91]  | 23 ( 209,281)    | 10.99 [ 7.32;16.49]     |
| Brandenburg            | Brandenburg            | City of Potsdam                           | 96 ( 171,797)   | 55.88 [ 45.77;68.23]    | 113 ( 175,711)  | 64.31 [ 53.5;77.31]    | 86 ( 178,091)    | 48.29 [ 39.11;59.63]    | 59 ( 180,318)   | 32.72 [ 25.37;42.2]   | 84 ( 180,335)    | 46.58 [ 37.63;57.66]    |
| Brandenburg            | Brandenburg            | City of Frankfurt (Oder)                  | 37 ( 58,194)    | 63.58 [ 46.13;87.62]    | 29 ( 58,233)    | 49.8 [ 34.68;71.51]    | 37 ( 57,876)     | 63.93 [ 46.39;88.1]     | 34 ( 57,754)    | 58.87 [ 42.13;82.25]  | 23 ( 57,745)     | 39.83 [ 26.54;59.76]    |
| Brandenburg            | Brandenburg            | City of Cottbus                           | 29 ( 100,416)   | 28.88 [ 20.11;41.47]    | 11 ( 101,010)   | 10.89 [ 6.08;19.5]     | 19 ( 100,211)    | 18.96 [ 12.14;29.61]    | 13 ( 99,693)    | 13.04 [ 7.62;22.31]   | 22 ( 99,683)     | 22.07 [ 14.58;33.42]    |
| Brandenburg            | Brandenburg            | City of Brandenburg a.d.Havel             | 82 ( 71,666)    | 114.42 [ 92.2;141.99]   | 101 ( 71,886)   | 140.5 [ 115.65;170.67] | 95 ( 72,123)     | 131.72 [ 107.77;160.98] | 82 ( 72,183)    | 113.6 [ 91.54;140.97] | 110 ( 72,183)    | 152.39 [ 126.46;183.62] |
| Berlin                 | Berlin                 | City of Berlin Treptow-Köpenick           | 57 ( 250,770)   | 22.73 [ 17.55;29.45]    | 74 ( 265,043)   | 27.92 [ 22.24;35.05]   | 82 ( 269,737)    | 30.4 [ 24.49;37.73]     | 69 ( 266,512)   | 25.89 [ 20.46;32.76]  | 80 ( 266,489)    | 30.02 [ 24.12;37.36]    |
| Berlin                 | Berlin                 | City of Berlin Tempelhof-Schöneberg       | 54 ( 336,868)   | 16.03 [ 12.29;20.91]    | 69 ( 348,661)   | 19.79 [ 15.64;25.04]   | 62 ( 351,474)    | 17.64 [ 13.76;22.61]    | 54 ( 341,772)   | 15.8 [ 12.11;20.61]   | 77 ( 341,767)    | 22.53 [ 18.03;28.15]    |
| Berlin                 | Berlin                 | City of Berlin Steglitz-Zehlendorf        | 99 ( 293,943)   | 33.68 [ 27.67;41]       | 73 ( 307,110)   | 23.77 [ 18.91;29.88]   | 84 ( 308,031)    | 27.27 [ 22.03;33.76]    | 69 ( 302,234)   | 22.83 [ 18.04;28.89]  | 77 ( 302,198)    | 25.48 [ 20.39;31.84]    |
| Berlin                 | Berlin                 | City of Berlin Spandau                    | 32 ( 232,727)   | 13.75 [ 9.74;19.41]     | 34 ( 242,165)   | 14.04 [ 10.05;19.62]   | 32 ( 243,161)    | 13.16 [ 9.32;18.58]     | 32 ( 238,984)   | 13.39 [ 9.49;18.9]    | 33 ( 238,957)    | 13.81 [ 9.83;19.39]     |
| Berlin                 | Berlin                 | City of Berlin Reinickendorf              | 50 ( 253,550)   | 19.72 [ 14.96;25.99]    | 36 ( 263,543)   | 13.66 [ 9.87;18.91]    | 23 ( 264,977)    | 8.68 [ 5.78;13.03]      | 54 ( 259,740)   | 20.79 [ 15.94;27.12]  | 43 ( 259,662)    | 16.56 [ 12.3;22.3]      |
| Berlin                 | Berlin                 | City of Berlin Pankow                     | 170 ( 386,364)  | 44 [ 37.87;51.13]       | 153 ( 402,314)  | 38.03 [ 32.46;44.55]   | 111 ( 407,041)   | 27.27 [ 22.65;32.84]    | 155 ( 398,048)  | 38.94 [ 33.27;45.57]  | 168 ( 398,010)   | 42.21 [ 36.29;49.09]    |
| Berlin                 | Berlin                 | City of Berlin Neukölln                   | 61 ( 322,410)   | 18.92 [ 14.73;24.3]     | 61 ( 329,374)   | 18.52 [ 14.42;23.79]   | 51 ( 330,739)    | 15.42 [ 11.73;20.27]    | 51 ( 321,159)   | 15.88 [ 12.08;20.88]  | 58 ( 321,152)    | 18.06 [ 13.97;23.34]    |
| Berlin                 | Berlin                 | City of Berlin Mitte                      | 56 ( 363,636)   | 15.4 [ 11.86;20]        | 32 ( 377,804)   | 8.47 [ 6;11.96]        | 39 ( 383,481)    | 10.17 [ 7.44;13.9]      | 57 ( 375,247)   | 15.19 [ 11.73;19.68]  | 56 ( 375,335)    | 14.92 [ 11.49;19.37]    |
| Berlin                 | Berlin                 | City of Berlin Marzahn-Hellersdorf        | 124 ( 256,145)  | 48.41 [ 40.61;57.71]    | 90 ( 266,667)   | 33.75 [ 27.46;41.48]   | 97 ( 268,773)    | 36.09 [ 29.59;44.02]    | 103 ( 262,956)  | 39.17 [ 32.3;47.5]    | 127 ( 262,940)   | 48.3 [ 40.6;57.46]      |
| Berlin                 | Berlin                 | City of Berlin Lichtenberg                | 53 ( 274,754)   | 19.29 [ 14.75;25.23]    | 42 ( 286,299)   | 14.67 [ 10.85;19.83]   | 63 ( 290,456)    | 21.69 [ 16.96;27.75]    | 88 ( 286,552)   | 30.71 [ 24.93;37.83]  | 72 ( 286,510)    | 25.13 [ 19.96;31.64]    |
| Berlin                 | Berlin                 | City of Berlin Friedrichshain-Kreuzberg   | 103 ( 277,853)  | 37.07 [ 30.57;44.95]    | 61 ( 283,985)   | 21.48 [ 16.72;27.59]   | 74 ( 289,175)    | 25.59 [ 20.39;32.12]    | 85 ( 282,017)   | 30.14 [ 24.38;37.26]  | 125 ( 282,040)   | 44.32 [ 37.2;52.8]      |
| Berlin                 | Berlin                 | City of Berlin Charlottenburg-Wilmersdorf | 41 ( 325,914)   | 12.58 [ 9.27;17.06]     | 38 ( 338,681)   | 11.22 [ 8.18;15.4]     | 37 ( 341,328)    | 10.84 [ 7.86;14.94]     | 34 ( 334,317)   | 10.17 [ 7.28;14.21]   | 27 ( 334,572)    | 8.07 [ 5.55;11.74]      |
| Bavaria                | Unterfranken           | City of Würzburg                          | 82 ( 126,018)   | 65.07 [ 52.43;80.75]    | 16 ( 126,683)   | 12.63 [ 7.77;20.52]    | 9 ( 127,841)     | 7.04 [ 3.7;13.38]       | 9 ( 128,023)    | 7.03 [ 3.7;13.36]     | 51 ( 127,948)    | 39.86 [ 30.32;52.4]     |
| Bavaria                | Oberpfalz              | City of Weiden i.d.OPf.                   | 12 ( 42,493)    | 28.24 [ 16.16;49.36]    | 10 ( 42,535)    | 23.51 [ 12.77;43.28]   | 16 ( 42,519)     | 37.63 [ 23.16;61.12]    | 16 ( 42,746)    | 37.43 [ 23.04;60.8]   | 11 ( 42,735)     | 25.74 [ 14.37;46.09]    |
| Bavaria                | Niederbayern           | City of Straubing                         | 4 ( 47,114)     | 8.49 [ 3.3;21.83]       | 3 ( 47,619)     | 6.3 [ 2.14;18.52]      | 7 ( 47,782)      | 14.65 [ 7.1;30.24]      | 16 ( 47,790)    | 33.48 [ 20.61;54.38]  | 21 ( 47,792)     | 43.94 [ 28.74;67.17]    |
| Bavaria                | Unterfranken           | City of Schweinfurt                       | 13 ( 52,717)    | 24.66 [ 14.41;42.19]    | 3 ( 53,476)     | 5.61 [ 1.91;16.49]     | 2 ( 54,054)      | 3.7 [ 1.01;13.49]       | 4 ( 53,405)     | 7.49 [ 2.91;19.26]    | 3 ( 53,381)      | 5.62 [ 1.91;16.52]      |
| Bavaria                | Mittelfranken          | City of Schwabach                         | NA ( NA)        | NA [ NA;NA]             | NA ( NA)        | NA [ NA;NA]            | NA ( NA)         | NA [ NA;NA]             | NA ( NA)        | NA [ NA;NA]           | 4 ( 40,984)      | 9.76 [ 3.8;25.09]       |
| Bavaria                | Oberbayern             | City of Rosenheim                         | 3 ( 62,630)     | 4.79 [ 1.63;14.08]      | 3 ( 63,025)     | 4.76 [ 1.62;14]        | 2 ( 63,291)      | 3.16 [ 0.87;11.52]      | NA ( NA)        | NA [ NA;NA]           | 7 ( 63,579)      | 11.01 [ 5.33;22.73]     |
| Bavaria                | Oberpfalz              | City of Regensburg                        | 41 ( 148,658)   | 27.58 [ 20.33;37.41]    | 21 ( 150,862)   | 13.92 [ 9.11;21.28]    | 17 ( 152,603)    | 11.14 [ 6.96;17.84]     | 5 ( 152,905)    | 3.27 [ 1.4;7.66]      | 31 ( 153,086)    | 20.25 [ 14.27;28.74]    |
| Bavaria                | Niederbayern           | City of Passau                            | NA ( NA)        | NA [ NA;NA]             | 41 ( 51,781)    | 79.18 [ 58.38;107.39]  | 51 ( 52,469)     | 97.2 [ 73.94;127.77]    | 40 ( 52,805)    | 75.75 [ 55.64;103.13] | 87 ( 52,804)     | 164.76 [ 133.6;203.17]  |
| Bavaria                | Mittelfranken          | City of Nürnberg                          | 113 ( 511,544)  | 22.09 [ 18.38;26.56]    | 91 ( 515,289)   | 17.66 [ 14.39;21.68]   | 127 ( 518,367)   | 24.5 [ 20.59;29.15]     | 113 ( 518,349)  | 21.8 [ 18.13;26.21]   | 140 ( 518,327)   | 27.01 [ 22.89;31.87]    |
| Bavaria                | Oberbayern             | City of München                           | 55 ( 1,462,766) | 3.76 [ 2.89;4.89]       | 65 ( 1,457,399) | 4.46 [ 3.5;5.68]       | 115 ( 1,470,588) | 7.82 [ 6.52;9.39]       | 79 ( 1,484,962) | 5.32 [ 4.27;6.63]     | 154 ( 1,483,622) | 10.38 [ 8.87;12.15]     |

|         |               |                    |               |                      |               |                      |               |                      |               |                      |               |                      |
|---------|---------------|--------------------|---------------|----------------------|---------------|----------------------|---------------|----------------------|---------------|----------------------|---------------|----------------------|
| Bavaria | Schwaben      | City of Memmingen  | 6 ( 43,290)   | 13.86 [ 6.35;30.24]  | 2 ( 43,478)   | 4.6 [ 1.26;16.77]    | 10 ( 43,840)  | 22.81 [ 12.39;41.99] | 5 ( 44,092)   | 11.34 [ 4.84;26.55]  | 6 ( 44,085)   | 13.61 [ 6.24;29.69]  |
| Bavaria | Niederbayern  | City of Landshut   | 26 ( 70,024)  | 37.13 [ 25.34;54.4]  | 23 ( 71,185)  | 32.31 [ 21.53;48.48] | 32 ( 72,398)  | 44.2 [ 31.31;62.39]  | 31 ( 73,408)  | 42.23 [ 29.75;59.93] | 48 ( 73,406)  | 65.39 [ 49.33;86.68] |
| Bavaria | Oberbayern    | City of Ingolstadt | 14 ( 133,588) | 10.48 [ 6.24;17.59]  | 24 ( 135,211) | 17.75 [ 11.93;26.41] | 36 ( 136,986) | 26.28 [ 18.98;36.38] | 29 ( 137,376) | 21.11 [ 14.7;30.32]  | 37 ( 137,393) | 26.93 [ 19.54;37.11] |
| Bavaria | Oberfranken   | City of Hof        | NA ( NA)      | NA [ NA;NA]          | 2 ( 45,977)   | 4.35 [ 1.19;15.86]   | 4 ( 45,924)   | 8.71 [ 3.39;22.4]    | 1 ( 45,872)   | 2.18 [ 0.38;12.35]   | 6 ( 45,837)   | 13.09 [ 6;28.56]     |
| Bavaria | Mittelfranken | City of Fürth      | 2 ( 125,786)  | 1.59 [ 0.44;5.8]     | 1 ( 126,582)  | 0.79 [ 0.14;4.48]    | 1 ( 128,205)  | 0.78 [ 0.14;4.42]    | 9 ( 128,571)  | 7 [ 3.68;13.3]       | 7 ( 128,440)  | 5.45 [ 2.64;11.25]   |
| Bavaria | Mittelfranken | City of Erlangen   | 41 ( 110,245) | 37.19 [ 27.42;50.44] | 25 ( 111,012) | 22.52 [ 15.26;33.24] | 59 ( 111,954) | 52.7 [ 40.86;67.97]  | 28 ( 112,540) | 24.88 [ 17.22;35.96] | 37 ( 112,530) | 32.88 [ 23.86;45.31] |
| Bavaria | Oberfranken   | City of Coburg     | 6 ( 41,068)   | 14.61 [ 6.7;31.87]   | 9 ( 41,228)   | 21.83 [ 11.49;41.49] | 2 ( 41,237)   | 4.85 [ 1.33;17.68]   | 15 ( 41,073)  | 36.52 [ 22.13;60.25] | 4 ( 41,068)   | 9.74 [ 3.79;25.04]   |
| Bavaria | Oberfranken   | City of Bayreuth   | NA ( NA)      | NA [ NA;NA]          | 2 ( 74,074)   | 2.7 [ 0.74;9.84]     | 3 ( 74,627)   | 4.02 [ 1.37;11.82]   | 10 ( 74,794)  | 13.37 [ 7.26;24.61]  | 15 ( 74,776)  | 20.06 [ 12.16;33.1]  |
| Bavaria | Oberfranken   | City of Bamberg    | 45 ( 75,745)  | 59.41 [ 44.41;79.48] | 41 ( 77,184)  | 53.12 [ 39.16;72.05] | 49 ( 77,593)  | 63.15 [ 47.77;83.47] | 14 ( 77,391)  | 18.09 [ 10.78;30.37] | 14 ( 77,391)  | 18.09 [ 10.78;30.37] |
| Bavaria | Schwaben      | City of Augsburg   | 15 ( 289,575) | 5.18 [ 3.14;8.55]    | 18 ( 292,683) | 6.15 [ 3.89;9.72]    | 11 ( 294,906) | 3.73 [ 2.08;6.68]    | 6 ( 297,030)  | 2.02 [ 0.93;4.41]    | 20 ( 296,736) | 6.74 [ 4.36;10.41]   |
| Bavaria | Mittelfranken | City of Ansbach    | 15 ( 41,528)  | 36.12 [ 21.89;59.59] | 17 ( 41,656)  | 40.81 [ 25.48;65.35] | 8 ( 41,841)   | 19.12 [ 9.69;37.73]  | 14 ( 41,804)  | 33.49 [ 19.95;56.21] | 6 ( 41,812)   | 14.35 [ 6.58;31.31]  |
| Bavaria | Oberpfalz     | City of Amberg     | 4 ( 42,328)   | 9.45 [ 3.67;24.3]    | 1 ( 42,194)   | 2.37 [ 0.42;13.42]   | 1 ( 42,017)   | 2.38 [ 0.42;13.48]   | 1 ( 42,194)   | 2.37 [ 0.42;13.42]   | 5 ( 42,194)   | 11.85 [ 5.06;27.74]  |
