# Supplementary material for: Incidence of Lyme Borreliosis in Germany: Exploring Observed Trends Over Time Using Public Surveillance Data, 2016–2020
Source: PubMed Central journal article supplement (PMC10122258; doi:10.1089/vbz.2022.0046), 2023-04-12
Supplement: Supp_TableS5.pdf [file Supp_TableS5.pdf]

**Table S5. Average annual cases and average annual incidence (per 100,000 person-years,  $\pm$  95% CI) of overall Lyme borreliosis notified by 19 German Regions Territorial Units NUTS2 and by sex, over years 2016–2020.**

| Region/ NUTS2                           | Females            |                      | Males              |                      |
|-----------------------------------------|--------------------|----------------------|--------------------|----------------------|
|                                         | Cases (population) | Incidence [95% CI]   | Cases (population) | Incidence [95% CI]   |
| Territorial unit Mittelfranken          | 417 ( 895,706)     | 46.6 [42.93; 50.52]  | 337 ( 870,479)     | 38.67 [35.28; 42.31] |
| Territorial unit Niederbayern           | 554 (616,506)      | 89.8 [83.69; 96.27]  | 481 (618,811)      | 77.64 [71.95; 83.68] |
| Territorial unit Oberbayern             | 491 (2,364,004)    | 20.76 [19.25; 22.36] | 430 (2,314,379)    | 18.56 [17.13; 20.09] |
| Territorial unit Oberfranken            | 252 (541,101)      | 46.57 [41.88; 51.67] | 208 (524,354)      | 39.63 [35.24; 44.44] |
| Territorial unit Oberpfalz              | 251 (555,721)      | 45.2 [40.66; 50.14]  | 227 (551,574)      | 41.16 [36.82; 45.89] |
| Territorial unit Schwaben               | 223 (946,480)      | 23.54 [21.01; 26.3]  | 193 (937,155)      | 20.55 [18.19; 23.15] |
| Territorial unit Unterfranken           | 299 (663,703)      | 45.02 [40.84; 49.52] | 256 (651,271)      | 39.37 [35.44; 43.64] |
| Territorial unit Berlin                 | 474 (1,864,028)    | 25.47 [23.58; 27.47] | 366 (1,811,746)    | 20.23 [18.53; 22.05] |
| Territorial unit Brandenburg            | 907 (1,271,915)    | 71.33 [67.48; 75.34] | 714 (1,238,994)    | 57.68 [54.18; 61.35] |
| Territorial unit Mecklenburg-Vorpommern | 478 (815,689)      | 58.65 [54.33; 63.24] | 392 (793,879)      | 49.35 [45.34; 53.63] |
| Territorial unit Koblenz                | 351 (757,230)      | 46.3 [42.32; 50.57]  | 327 (738,297)      | 44.32 [40.38; 48.55] |
| Territorial unit Rheinhessen-Pfalz      | 266 (1,042,314)    | 25.56 [23.05; 28.28] | 222 (1,013,621)    | 21.86 [19.51; 24.43] |
| Territorial unit Trier                  | 88 (266,773)       | 33.14 [27.61; 39.5]  | 87 (264,340)       | 32.76 [27.22; 39.15] |
| Territorial unit Saarland               | 144 (504,561)      | 28.66 [24.9; 32.86]  | 112 (486,432)      | 23.15 [19.73; 27.02] |
| Territorial unit Chemnitz               | 506 (731,657)      | 69.14 [64.17; 74.39] | 381 (706,085)      | 53.91 [49.46; 58.66] |
| Territorial unit Dresden                | 567 (807,679)      | 70.18 [65.4; 75.22]  | 409 (790,334)      | 51.8 [47.67; 56.21]  |
| Territorial unit Leipzig                | 96 (529,099)       | 18.15 [15.21; 21.5]  | 79 (512,305)       | 15.38 [12.66; 18.54] |
| Territorial unit Saxony-Anhalt          | 288 (1,122,783)    | 25.63 [23.2; 28.26]  | 234 (1,088,783)    | 21.46 [19.2; 23.91]  |
| Territorial unit Thuringia              | 286 (1,082,728)    | 26.42 [23.9; 29.13]  | 234 (1,061,232)    | 22.05 [19.74; 24.57] |
| Total                                   | 6,940 (17,379,066) | 39.93 [39.14; 40.73] | 5,688 (16,973,138) | 33.51 [32.78; 34.25] |
