# Supplementary material for: Incidence of Lyme Borreliosis in Germany: Exploring Observed Trends Over Time Using Public Surveillance Data, 2016–2020
Source: PubMed Central journal article supplement (PMC10122258; doi:10.1089/vbz.2022.0046), 2023-04-12
Supplement: Supp_TableS6.pdf [file Supp_TableS6.pdf]

**Table S6. Cases and incidence (per 100,000 person-time,  $\pm$  95% CI) of clinically diagnosed and of clinically diagnosed and laboratory confirmed Lyme borreliosis (LB) notified by year and sex in all 9 German States, yearly 2016–2020.**

| Year         | Clinically diagnosed LB |                     |                    |                     | Clinically diagnosed & laboratory confirmed LB |                    |                    |                    |
|--------------|-------------------------|---------------------|--------------------|---------------------|------------------------------------------------|--------------------|--------------------|--------------------|
|              | Females                 |                     | Males              |                     | Females                                        |                    | Males              |                    |
|              | Cases (population)      | Incidence [95% CI]  | Cases (population) | Incidence [95% CI]  | Cases (population)                             | Incidence [95% CI] | Cases (population) | Incidence [95% CI] |
| <b>2016</b>  | 6,062 (17,289,785)      | 35.06 [34.19;35.95] | 5,037 (16,860,614) | 29.87 [29.06;30.71] | 880 (17,289,785)                               | 5.09 [4.76;5.44]   | 805 (16,860,614)   | 4.77 [4.46;5.12]   |
| <b>2017</b>  | 5,874 (17,374,299)      | 33.81 [32.96;34.68] | 4,760 (16,973,973) | 28.04 [27.26;28.85] | 262 (17,374,299)                               | 1.51 [1.34;1.7]    | 272 (16,973,973)   | 1.6 [1.42;1.8]     |
| <b>2018</b>  | 7,051 (17,417,654)      | 40.48 [39.55;41.44] | 5,655 (17,032,865) | 33.2 [32.35;34.08]  | 199 (17,417,654)                               | 1.14 [0.99;1.31]   | 254 (17,032,865)   | 1.49 [1.32;1.69]   |
| <b>2019</b>  | 6,547 (17,406,874)      | 37.61 [36.71;38.53] | 5,111 (16,999,031) | 30.07 [29.25;30.9]  | 220 (17,406,874)                               | 1.26 [1.11;1.44]   | 235 (16,999,031)   | 1.38 [1.22;1.57]   |
| <b>2020</b>  | 7,524 (17,407,473)      | 43.22 [42.26;44.21] | 6,161 (16,999,394) | 36.24 [35.35;37.16] | 77 (17,407,473)                                | 0.44 [0.35;0.55]   | 148 (16,999,394)   | 0.87 [0.74;1.02]   |
| <b>Total</b> | 33,058                  |                     | 26,724             |                     | 1,638                                          |                    | 1,714              |                    |
